# Supplementary material for: Advancing energetic chemistry: the first synthesis of sulfur-based C–C bonded thiadiazole-pyrazine compounds with a nitrimino moiety
Source: Royal Society of Chemistry journal article supplement (doi:10.1039/d4dt02919d), 2024-01-01
Supplement: d4dt02919d1.pdf [file d4dt02919d1.pdf]

## Supporting Information (SI)

# Advancing Energetic Chemistry: First Synthesis of Sulfur-Based C-C Bonded Thiadiazole-Pyrazine Compounds with Nitrino Moiety

Parasar Kumar,<sup>a</sup> Vikas D. Ghule,<sup>b</sup> Srinivas Dharavath <sup>a\*</sup>

<sup>a</sup>Energetic Materials Laboratory, Department of Chemistry, Indian Institute of Technology Kanpur, Kanpur-208016, Uttar Pradesh, India.

E-mail: [srinivasd@iitk.ac.in](mailto:srinivasd@iitk.ac.in)

<sup>b</sup>Department of Chemistry, National Institute of Technology Kurukshetra, Kurukshetra-136119, Haryana, India.

### Table of Contents

|                                                               |         |
|---------------------------------------------------------------|---------|
| <b>General methods</b>                                        | S1      |
| <b>Experimental conditions</b>                                | S2-S5   |
| <b>Crystal Structure for 3</b>                                | S5-S9   |
| <b>NMR, IR, HRMS spectrum &amp; TGA-DSC plots for 2 to 7.</b> | S10-S23 |
| <b>Computational Details</b>                                  | S23-S30 |
| <b>References</b>                                             | S30     |

**Caution!** All the compounds investigated are potentially explosive, energetic materials. Although we have experienced no difficulties in syntheses and characterization of these compounds, manipulations must be carried out by using appropriate standard safety precautions. Eye protection and leather gloves must be always worn.

### **General Methods.**

Reagents were purchased from Ak Scientifics, Acros Organics, or Aldrich as analytical grade and were used as received.  $^1\text{H}$  NMR and  $^{13}\text{C}$  NMR spectra were recorded using JEOL DELTA (ECS) 500 ( $^1\text{H}$ , 500 MHz;  $^{13}\text{C}$ , 126 MHz) nuclear magnetic resonance spectrometer. DMSO- $d_6$  was employed as the solvent and locking solvent. Chemical shifts are given relative to  $(\text{CH}_3)_4\text{Si}$  for  $^1\text{H}$  and  $^{13}\text{C}$  spectra. HRMS was recorded on a Quadrupole Time-of-Flight (Q-TOF) Mass Spectrometry Decomposition temperatures (onset) were recorded using a dry nitrogen gas purge and at a heating rate of  $5\text{ }^\circ\text{C min}^{-1}$  on a differential scanning calorimeter (SDT650). IR spectra were recorded using Zn-Se pellets with ECO-ATR spectrometer (Bruker Alpha II). Density was determined at room temperature by employing Anton Par Ultra5000 gas pycnometer in helium atmosphere. Impact and friction-sensitivity measurements were tested by employing a standard BAM Fall hammer and a BAM friction tester. The single-crystal X-ray data collection was carried out using Bruker APEX-II CCD diffractometer. The crystal was kept at 100 K during data collection.

### **Experimental Section:**

**Synthesis of pyrazine-2,3-dicarbonitrile (1):** 2,3-diaminomaleonitrile (1 gm, 9.25 mmol) and glyoxal (1.52 gm, 26.2 mmol) was suspended in water (20 mL) and to this oxalic acid dihydrate (240 mg, 1.9 mmol) was added slowly with constant stirring. The reaction mixture was heated to  $80\text{ }^\circ\text{C}$  for 4 hours, cooled to room temperature. Newly formed precipitate was filtered off, washed with distilled water, and dried in oven at  $50\text{ }^\circ\text{C}$  to get pure product. The spectroscopic data were well matching with the previous literature.<sup>1</sup> Yield 85% (1023 mg, 7.87 mmol).  $^1\text{H}$  NMR (500 MHz,  $\text{CDCl}_3$ ):  $\delta$  (ppm) 8.94 (s, 2H).  $^{13}\text{C}$  NMR (126 MHz,  $\text{CDCl}_3$ ):  $\delta$ (ppm) 147.25, 134.18, 112.77.

**Synthesis of 5,5'-(pyrazine-2,3-diyl)bis(1,3,4-thiadiazol-2-amine) (2):** Compound 1 (1500 mg, 11.5 mmol) was slowly added to trifluoroacetic acid (TFA, 25 mL) followed by the pinch-wise addition of thiosemicarbazide (2625 mg, 28.84 mmol) at room temperature. The reaction mixture was heated to  $60\text{ }^\circ\text{C}$  for 16 hours and allowed to cool down to room

temperature. Aqueous ammonium solution (25%) was added dropwise to the reaction mixture till the white fume ceases and the formation of precipitate was observed. The newly formed precipitate was filtered, washed with cold water, and dried in oven at 50 °C to get pure brown solid in 87% yield (2790 mg, 10 mmol).  $T_d(\text{onset})$ : 252 °C.  $^1\text{H NMR}$  (500 MHz,  $\text{DMSO-d}_6$ ):  $\delta$  (ppm) 8.74 (s, 2H), 7.56 (s, 4H).  $^{13}\text{C NMR}$  (126 MHz,  $\text{DMSO-d}_6$ ):  $\delta$ (ppm) 170.34, 154.00, 143.49, 142.74. IR (ATR, ZnSe,  $\text{cm}^{-1}$ ): 867, 1071, 1128, 1169, 1398, 1494, 1605, 3078, 3240. HRMS (ESI-QTOF)  $m/z$ : calculated for  $\text{C}_8\text{H}_6\text{N}_8\text{S}_2$   $[\text{M}+\text{H}]^+$  279.0230; found 279.0237.

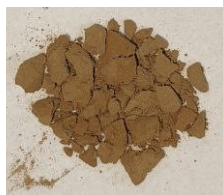

**Synthesis of 5,5'-(pyrazine-2,3-diyl)bis(1,3,4-thiadiazol-2-nitrimino) (3):** 100%  $\text{HNO}_3$  (6 mL), 98%  $\text{H}_2\text{SO}_4$  (9 mL) was placed in ice bath and to this compound **2** (1000 mg, 3.59 mmol) was added slowly with uniform stirring. The reaction mixture was stirred at the same temperature for 30 minutes and then at room temperature for 12 hours. The brownish solution was poured into crushed ice. The formed yellow precipitate was filtered off, washed with water, and dried in oven. Yield 72% (954 mg, 2.59 mmol).  $T_d(\text{onset})$ : 207 °C.  $^1\text{H NMR}$  (500 MHz,  $\text{DMSO-d}_6$ ):  $\delta$  (ppm) 8.99 (s, 2H).  $^{13}\text{C NMR}$  (126 MHz,  $\text{DMSO-d}_6$ ): 171.38, 156.53, 145.40, 141.53. IR (ATR, ZnSe,  $\text{cm}^{-1}$ ): 761, 992, 1236, 1389, 1508, 1549, 2845, 2996. HRMS (ESI-QTOF)  $m/z$ : calculated for  $\text{C}_8\text{H}_4\text{N}_{10}\text{O}_4\text{S}_2$   $[\text{M}-\text{H}]^-$  366.9786; found 366.9784. Elemental analysis: (%) calculated for  $\text{C}_8\text{H}_4\text{N}_{10}\text{O}_4\text{S}_2$  (368.30): C, 26.09; H, 1.09; N, 38.03; S, 17.41; found C, 26.64; H, 1.47; N, 38.02; S, 17.10.

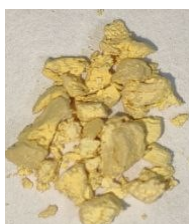

**General procedure for the synthesis of salts 4-7:** Compound **3** (100 mg, 0.27 mmol) was dissolved in methanol (5 mL), to this base hydrazine monohydrate (41 mg, 0.8 mmol), hydroxylamine hydrate (41 mg, 0.8 mmol), 7H-[1,2,4]triazolo[4,3-b][1,2,4]triazole-3,6,7-triamine (TATOT) (88 mg, 0.57 mmol) and 3,5-diamino-4H-1,2,4-triazole (DAT) (59 mg, 0.59 mmol) was added and stirred at room temperature for 12 hours. The formed precipitate

was collected by filtration, washed with methanol and dried in air to obtain pure product in quantitative yield.

**Synthesis of dihydrazinium-(pyrazine-2,3-diylbis(1,3,4-thiadiazole-5,2-diyl))bis(nitroamide) (4):** Dark yellow. Yield 84 % (98 mg, 0.22 mmol).  $T_d(\text{onset})$ : 222 °C.  $^1\text{H NMR}$  (500 MHz, DMSO- $d_6$ ):  $\delta$  (ppm) 8.76 (s, 2H), 5.44 (br, 10H).  $^{13}\text{C NMR}$  (126 MHz, DMSO- $d_6$ ):  $\delta$ (ppm) 171.62, 158.16, 144.23, 143.42. IR (ATR, ZnSe,  $\text{cm}^{-1}$ ): 957, 1076, 1312, 1380, 1535, 1601, 3318, 3399. Elemental analysis: (%) calculated for  $\text{C}_8\text{H}_{12}\text{N}_{14}\text{O}_4\text{S}_2 \cdot 1.5\text{H}_2\text{O}$  (459.42): C, 20.92; H, 3.29; N, 42.98; S, 13.96; found C, 20.00; H, 3.52; N, 43.08; S, 13.12.

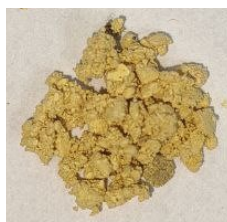

**Synthesis of dihydroxylammonium -(pyrazine-2,3-diylbis(1,3,4-thiadiazole-5,2-diyl))bis(nitroamide) (5):** Dark yellow. Yield 87 % (102 mg, 0.23 mmol).  $T_d(\text{onset})$ : 225 °C.  $^1\text{H NMR}$  (500 MHz, DMSO- $d_6$ ):  $\delta$  (ppm) 8.77 (s, 2H), 7.14 (br, 7H).  $^{13}\text{C NMR}$  (126 MHz, DMSO- $d_6$ ):  $\delta$ (ppm) 171.64, 158.23, 144.21, 143.52. IR (ATR, ZnSe,  $\text{cm}^{-1}$ ): 1012, 1131, 1317, 1384, 1626, 1684, 2827, 2885, 3026. Elemental analysis: (%) calculated for  $\text{C}_8\text{H}_{10}\text{N}_{12}\text{O}_6\text{S}_2$  (434.36): C, 22.12; H, 2.32; N, 38.70; S, 14.76; found C, 22.12; H, 3.52; N, 38.21; S, 14.63.

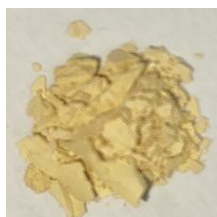

**Synthesis of di-3,6,7-triamino-7H-[1,2,4]triazolo[4,3-b][1,2,4]triazol-2-ium-(pyrazine-2,3-diylbis(1,3,4-thiadiazole-5,2-diyl))bis(nitroamide) (6):** Light yellow. Yield 80% (147 mg, 0.21 mmol).  $T_d(\text{onset})$ : 245 °C.  $^1\text{H NMR}$  (500 MHz, DMSO- $d_6$ ):  $\delta$  (ppm) 8.81(s, 2H), 8.20 (s, 4H), 7.23 (s, 4H), 5.77 (s, 4H).  $^{13}\text{C NMR}$  (126 MHz, DMSO- $d_6$ ):  $\delta$ (ppm) 171.67, 160.15, 157.80, 147.42, 143.93, 143.51, 141.12. IR (ATR, ZnSe,  $\text{cm}^{-1}$ ): 842, 994, 1077, 1132, 1237, 1280, 1398, 1445, 1499, 1564, 1658, 3126, 3326, 3426. Elemental analysis: (%) calculated for  $\text{C}_{14}\text{H}_{16}\text{N}_{26}\text{O}_4\text{S}_2$  (676.58): C, 24.85; H, 2.38; N, 53.83; S, 9.48; found C, 24.29; H, 2.78; N, 57.38; S, 7.09.

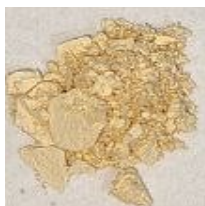

**Synthesis of di-3,5-diamino-4H-1,2,4-triazol-1-ium-(pyrazine-2,3-diylbis(1,3,4-thiadiazole-5,2-diyl))bis(nitroamide) (7):** brownish yellow. Yield 78% (120 mg, 0.21 mmol).  $T_d(\text{onset})$ : 246 °C.  $^1\text{H NMR}$  (500 MHz,  $\text{DMSO-d}_6$ ):  $\delta$  (ppm) 8.77 (s, 2H), 7.33 (br, 4H).  $^{13}\text{C NMR}$  (126 MHz,  $\text{DMSO-d}_6$ ):  $\delta$ (ppm) 171.62, 158.13, 151.86, 144.12, 143.51. IR (ATR, ZnSe,  $\text{cm}^{-1}$ ): 715, 798, 999, 1076, 1350, 1454, 1671, 2660, 2975, 3117, 3326. Elemental analysis: (%) calculated for  $\text{C}_{12}\text{H}_{14}\text{N}_{20}\text{O}_4\text{S}_2 \cdot 0.5\text{H}_2\text{O}$  (575.50): C, 25.04; H, 2.63; N, 48.68; S, 11.14; found C, 25.21; H, 2.65; N, 48.20; S, 10.56.

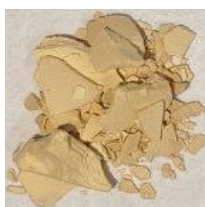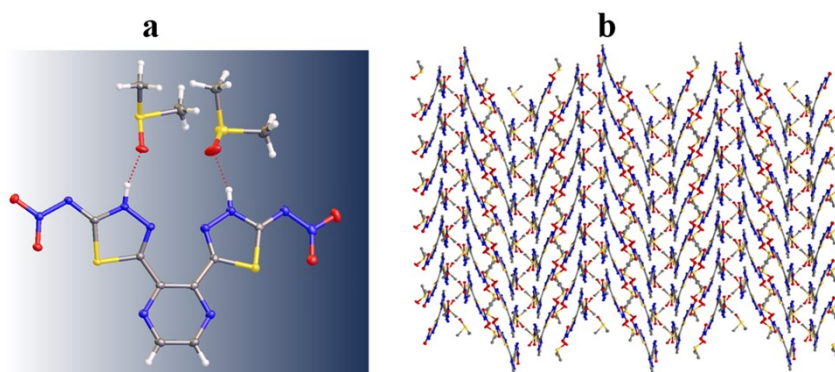

**Figure S1:** Crystal structure and wave-like crystal packing of **3**.

**Table S1: Crystallographic data for 3.**

|                   |                                                               |
|-------------------|---------------------------------------------------------------|
| CCDC              | 2379790                                                       |
| Empirical formula | $\text{C}_{12}\text{H}_{16}\text{N}_{10}\text{O}_6\text{S}_4$ |
| Formula weight    | 524.59                                                        |
| Temperature/K     | 100                                                           |
| Crystal system    | monoclinic                                                    |
| Space group       | $P2_1/c$                                                      |
| $a/\text{\AA}$    | 10.8555(4)                                                    |
| $b/\text{\AA}$    | 20.0560(8)                                                    |
| $c/\text{\AA}$    | 10.9976(4)                                                    |
| $\alpha/^\circ$   | 90                                                            |
| $\beta/^\circ$    | 117.7980(10)                                                  |

|                                               |                                                              |
|-----------------------------------------------|--------------------------------------------------------------|
| $\gamma/^\circ$                               | 90                                                           |
| Volume/ $\text{\AA}^3$                        | 2118.06(14)                                                  |
| Z                                             | 4                                                            |
| $\rho_{\text{calc}}/\text{cm}^3$              | 1.645                                                        |
| $\mu/\text{mm}^{-1}$                          | 0.504                                                        |
| F(000)                                        | 1080.0                                                       |
| Crystal size/ $\text{mm}^3$                   | $0.2 \times 0.15 \times 0.1$                                 |
| Radiation                                     | MoK $\alpha$ ( $\lambda = 0.71073$ )                         |
| $2\Theta$ range for data collection/ $^\circ$ | 4.062 to 56.7                                                |
| Index ranges                                  | $-14 \leq h \leq 14, -26 \leq k \leq 26, -14 \leq l \leq 14$ |
| Reflections collected                         | 35922                                                        |
| Independent reflections                       | 5296 [Rint = 0.0464, Rsigma = 0.0296]                        |
| Data/restraints/parameters                    | 5296/0/293                                                   |
| Goodness-of-fit on F2                         | 1.053                                                        |
| Final R indexes [ $I \geq 2\sigma(I)$ ]       | R1 = 0.0355, wR2 = 0.0799                                    |
| Final R indexes [all data]                    | R1 = 0.0449, wR2 = 0.0848                                    |
| Largest diff. peak/hole / $e \text{\AA}^{-3}$ | 0.91/-0.41                                                   |

**Table S2:** Fractional Atomic Coordinates ( $\times 10^4$ ) and Equivalent Isotropic Displacement Parameters ( $\text{\AA}^2 \times 10^3$ ) for **3**. U<sub>eq</sub> is defined as 1/3 of of the trace of the orthogonalised U<sub>ij</sub> tensor.

| Atom | x           | y          | z           | U(eq)     |
|------|-------------|------------|-------------|-----------|
| S2   | -613.9(4)   | 6671.2(2)  | 3975.1(4)   | 13.84(10) |
| S002 | 4455.7(5)   | 6868.2(2)  | 2927.0(5)   | 17.23(10) |
| S1   | 4651.3(5)   | 5998.8(2)  | 10120.9(5)  | 15.55(10) |
| S004 | 7009.8(6)   | 4740.3(3)  | 6537.7(6)   | 26.12(12) |
| O005 | -2289.3(13) | 6894.4(7)  | 1423.5(13)  | 18.0(3)   |
| O006 | -1863.6(14) | 6901.6(7)  | -323.2(13)  | 21.5(3)   |
| O007 | 3696.7(14)  | 7279.3(7)  | 3533.8(15)  | 21.4(3)   |
| O008 | 6805.4(15)  | 5548.2(7)  | 12182.8(14) | 23.0(3)   |
| O009 | 8743.2(15)  | 5166.0(8)  | 12320.4(15) | 27.2(3)   |
| N4   | 1685.0(16)  | 6856.5(8)  | 3967.3(15)  | 15.0(3)   |
| N2   | 1922.3(17)  | 6413.3(8)  | 9219.9(16)  | 16.5(3)   |
| N6   | -1465.4(16) | 6885.3(8)  | 925.5(16)   | 15.0(3)   |
| N8   | 5249.4(16)  | 5750.6(8)  | 8210.2(16)  | 17.4(3)   |
| N5   | -69.9(16)   | 6863.5(8)  | 1739.9(15)  | 14.7(3)   |
| N1   | -331.7(16)  | 6603.8(8)  | 6657.9(16)  | 16.3(3)   |
| N7   | 3926.3(16)  | 5989.4(8)  | 7522.0(16)  | 16.4(3)   |
| N3   | 2072.5(16)  | 6768.3(8)  | 5324.7(15)  | 14.8(3)   |
| O00I | 6182.6(19)  | 5352.9(10) | 6497.1(17)  | 40.7(5)   |
| N9   | 7107.9(16)  | 5463.6(8)  | 10275.3(16) | 17.6(3)   |
| N10  | 7557.6(17)  | 5394.9(8)  | 11646.8(17) | 19.3(3)   |
| C6   | 320.7(18)   | 6811.8(9)  | 3087.0(18)  | 13.3(3)   |
| C3   | 957.2(19)   | 6538.1(9)  | 6791.5(18)  | 14.0(3)   |
| C4   | 2085.6(19)  | 6386.7(9)  | 8077.8(18)  | 14.1(3)   |
| C1   | -487(2)     | 6589.0(10) | 7796(2)     | 18.1(4)   |
| C2   | 662(2)      | 6534.2(10) | 9084(2)     | 18.7(4)   |
| C8   | 5818.8(19)  | 5711.1(9)  | 9581.0(19)  | 14.9(3)   |
| C7   | 3485.0(19)  | 6151.9(9)  | 8391.7(18)  | 14.5(3)   |

|      |           |            |            |         |
|------|-----------|------------|------------|---------|
| C5   | 979.1(18) | 6649.1(9)  | 5477.5(18) | 14.0(3) |
| C00T | 5204(2)   | 7466.6(10) | 2266(2)    | 19.1(4) |
| C00U | 7879(2)   | 4954.7(10) | 5563(2)    | 22.4(4) |
| C00V | 6014(2)   | 6596.8(11) | 4358(2)    | 27.1(5) |
| C00W | 8472(3)   | 4733.9(12) | 8209(2)    | 32.2(5) |

**Table S3:** Anisotropic Displacement Parameters ( $\text{\AA}^2 \times 10^3$ ) for **3**. The Anisotropic displacement factor exponent takes the form:  $-2\pi^2[h2a*2U11+2hka*b*U12+\dots]$ .

| Atom | U11      | U22      | U33      | U23       | U13      | U12       |
|------|----------|----------|----------|-----------|----------|-----------|
| S2   | 11.5(2)  | 18.9(2)  | 13.1(2)  | -0.19(16) | 7.36(17) | -0.40(16) |
| S002 | 14.6(2)  | 20.8(2)  | 18.5(2)  | -2.20(18) | 9.60(18) | -2.24(17) |
| S1   | 14.2(2)  | 17.9(2)  | 14.6(2)  | -0.30(16) | 6.69(17) | 0.86(17)  |
| S004 | 29.5(3)  | 25.8(3)  | 30.0(3)  | 6.1(2)    | 19.8(2)  | 5.8(2)    |
| O005 | 13.5(6)  | 25.1(7)  | 17.8(7)  | -1.2(5)   | 9.2(5)   | -0.1(5)   |
| O006 | 19.8(7)  | 32.5(8)  | 12.2(6)  | 4.2(6)    | 7.3(6)   | 3.5(6)    |
| O007 | 19.5(7)  | 24.4(7)  | 28.8(7)  | 1.9(6)    | 18.4(6)  | 2.3(6)    |
| O008 | 21.0(7)  | 28.3(8)  | 19.6(7)  | 3.7(6)    | 9.5(6)   | 0.7(6)    |
| O009 | 17.3(7)  | 28.0(8)  | 27.1(8)  | 3.6(6)    | 2.6(6)   | 5.8(6)    |
| N4   | 12.4(7)  | 21.6(8)  | 12.9(7)  | 1.7(6)    | 7.5(6)   | 0.7(6)    |
| N2   | 18.1(8)  | 18.3(8)  | 14.0(7)  | 1.0(6)    | 8.3(6)   | 3.5(6)    |
| N6   | 14.3(7)  | 15.7(7)  | 15.5(7)  | 1.7(6)    | 7.3(6)   | 1.2(6)    |
| N8   | 15.5(8)  | 20.5(8)  | 16.9(8)  | 0.2(6)    | 8.2(7)   | 4.0(6)    |
| N5   | 12.2(7)  | 19.6(8)  | 13.4(7)  | 1.0(6)    | 6.7(6)   | 1.7(6)    |
| N1   | 16.1(8)  | 18.3(8)  | 16.1(8)  | 0.7(6)    | 8.8(6)   | 0.7(6)    |
| N7   | 15.2(7)  | 17.8(8)  | 16.2(8)  | 0.2(6)    | 7.4(6)   | 3.3(6)    |
| N3   | 13.5(7)  | 19.5(8)  | 13.0(7)  | 0.7(6)    | 7.5(6)   | 0.0(6)    |
| O00I | 49.4(11) | 52.7(11) | 32.6(9)  | 18.9(8)   | 29.8(8)  | 34.5(9)   |
| N9   | 15.5(8)  | 17.8(8)  | 18.0(8)  | 0.6(6)    | 6.6(6)   | 2.3(6)    |
| N10  | 15.9(8)  | 16.2(8)  | 21.9(8)  | 0.5(6)    | 5.6(7)   | -1.5(6)   |
| C6   | 13.6(8)  | 13.4(8)  | 15.6(8)  | -0.3(6)   | 9.1(7)   | 1.3(6)    |
| C3   | 15.5(8)  | 13.1(8)  | 15.6(8)  | -1.9(6)   | 9.1(7)   | -1.1(7)   |
| C4   | 16.4(9)  | 12.7(8)  | 14.3(8)  | -1.1(6)   | 8.2(7)   | -0.4(7)   |
| C1   | 16.3(9)  | 19.3(9)  | 21.4(9)  | 2.0(7)    | 11.2(8)  | 2.0(7)    |
| C2   | 21.9(10) | 21.1(10) | 17.7(9)  | 1.6(7)    | 13.0(8)  | 2.9(7)    |
| C8   | 14.5(8)  | 12.3(8)  | 18.1(9)  | -0.9(7)   | 7.9(7)   | -1.2(7)   |
| C7   | 15.1(8)  | 13.4(8)  | 14.2(8)  | 0.9(7)    | 6.2(7)   | -0.3(7)   |
| C5   | 13.5(8)  | 14.7(8)  | 14.2(8)  | -0.5(7)   | 6.7(7)   | 0.5(7)    |
| C00T | 15.7(9)  | 24.8(10) | 19.9(9)  | 3.3(8)    | 10.9(8)  | 0.2(7)    |
| C00U | 26.2(10) | 23.5(10) | 21.6(10) | -0.6(8)   | 14.5(9)  | 1.5(8)    |
| C00V | 19.4(10) | 29.7(11) | 30.8(11) | 12.4(9)   | 10.7(9)  | 7.1(9)    |
| C00W | 42.2(14) | 35.3(13) | 22.7(11) | 10.0(9)   | 18.3(10) | 18.6(10)  |

**Table S4:** Bond Lengths for **3**.

| Atom | Atom | Length/ $\text{\AA}$ | Atom | Atom | Length/ $\text{\AA}$ |
|------|------|----------------------|------|------|----------------------|
| S2   | C6   | 1.7284(18)           | N2   | C4   | 1.349(2)             |
| S2   | C5   | 1.7486(18)           | N2   | C2   | 1.327(2)             |
| S002 | O007 | 1.5221(14)           | N6   | N5   | 1.354(2)             |

|      |      |            |    |     |          |
|------|------|------------|----|-----|----------|
| S002 | C00T | 1.7827(19) | N8 | N7  | 1.361(2) |
| S002 | C00V | 1.775(2)   | N8 | C8  | 1.339(2) |
| S1   | C8   | 1.7302(19) | N5 | C6  | 1.341(2) |
| S1   | C7   | 1.7516(18) | N1 | C3  | 1.344(2) |
| S004 | O00I | 1.5101(17) | N1 | C1  | 1.339(2) |
| S004 | C00U | 1.780(2)   | N7 | C7  | 1.295(2) |
| S004 | C00W | 1.783(2)   | N3 | C5  | 1.296(2) |
| O005 | N6   | 1.2479(19) | N9 | N10 | 1.358(2) |
| O006 | N6   | 1.233(2)   | N9 | C8  | 1.338(2) |
| O008 | N10  | 1.248(2)   | C3 | C4  | 1.406(3) |
| O009 | N10  | 1.236(2)   | C3 | C5  | 1.473(2) |
| N4   | N3   | 1.361(2)   | C4 | C7  | 1.470(2) |
| N4   | C6   | 1.342(2)   | C1 | C2  | 1.388(3) |

**Table S5:** Bond Angles for **3**.

| Atom | Atom | Atom | Angle/°    | Atom | Atom | Atom | Angle/°    |
|------|------|------|------------|------|------|------|------------|
| C6   | S2   | C5   | 87.46(9)   | O009 | N10  | N9   | 115.97(16) |
| O007 | S002 | C00T | 104.88(9)  | N4   | C6   | S2   | 110.14(13) |
| O007 | S002 | C00V | 105.32(10) | N5   | C6   | S2   | 132.08(14) |
| C00V | S002 | C00T | 98.12(10)  | N5   | C6   | N4   | 117.75(16) |
| C8   | S1   | C7   | 87.71(9)   | N1   | C3   | C4   | 120.35(16) |
| O00I | S004 | C00U | 105.10(10) | N1   | C3   | C5   | 111.74(16) |
| O00I | S004 | C00W | 105.51(11) | C4   | C3   | C5   | 127.91(16) |
| C00U | S004 | C00W | 98.96(11)  | N2   | C4   | C3   | 119.81(16) |
| C6   | N4   | N3   | 117.08(15) | N2   | C4   | C7   | 111.37(16) |
| C2   | N2   | C4   | 118.58(16) | C3   | C4   | C7   | 128.72(16) |
| O005 | N6   | N5   | 121.33(15) | N1   | C1   | C2   | 120.69(17) |
| O006 | N6   | O005 | 122.52(15) | N2   | C2   | C1   | 121.22(17) |
| O006 | N6   | N5   | 116.14(15) | N8   | C8   | S1   | 109.84(13) |
| C8   | N8   | N7   | 117.42(15) | N9   | C8   | S1   | 131.78(15) |
| C6   | N5   | N6   | 114.39(15) | N9   | C8   | N8   | 118.38(16) |
| C1   | N1   | C3   | 118.32(16) | N7   | C7   | S1   | 115.38(14) |
| C7   | N7   | N8   | 109.62(15) | N7   | C7   | C4   | 127.22(17) |
| C5   | N3   | N4   | 109.45(15) | C4   | C7   | S1   | 117.11(13) |
| C8   | N9   | N10  | 114.19(16) | N3   | C5   | S2   | 115.77(14) |
| O008 | N10  | N9   | 121.59(16) | N3   | C5   | C3   | 126.13(17) |
| O009 | N10  | O008 | 122.44(17) | C3   | C5   | S2   | 118.00(13) |

**Table S6:** Torsion Angles for **6**.

| A    | B  | C  | D  | Angle/°     | A  | B  | C  | D  | Angle/°     |
|------|----|----|----|-------------|----|----|----|----|-------------|
| O005 | N6 | N5 | C6 | 3.9(2)      | C6 | N4 | N3 | C5 | 0.5(2)      |
| O006 | N6 | N5 | C6 | -176.75(16) | C3 | N1 | C1 | C2 | 2.6(3)      |
| N4   | N3 | C5 | S2 | -2.6(2)     | C3 | C4 | C7 | S1 | -179.21(15) |
| N4   | N3 | C5 | C3 | -178.81(17) | C3 | C4 | C7 | N7 | -5.6(3)     |
| N2   | C4 | C7 | S1 | -3.0(2)     | C4 | N2 | C2 | C1 | 4.2(3)      |
| N2   | C4 | C7 | N7 | 170.59(18)  | C4 | C3 | C5 | S2 | 167.93(15)  |



|     |    |    |    |             |    |    |     |            |             |
|-----|----|----|----|-------------|----|----|-----|------------|-------------|
| N6  | N5 | C6 | S2 | 8.7(3)      | C4 | C3 | C5  | N3         | -15.9(3)    |
| N6  | N5 | C6 | N4 | -173.29(15) | C1 | N1 | C3  | C4         | 6.7(3)      |
| N8  | N7 | C7 | S1 | -1.8(2)     | C1 | N1 | C3  | C5         | -172.80(16) |
| N8  | N7 | C7 | C4 | -175.55(17) | C2 | N2 | C4  | C3         | 5.0(3)      |
| N1  | C3 | C4 | N2 | -10.7(3)    | C2 | N2 | C4  | C7         | -171.56(16) |
| N1  | C3 | C4 | C7 | 165.16(18)  | C8 | S1 | C7  | N7         | 1.30(15)    |
| N1  | C3 | C5 | S2 | -12.6(2)    | C8 | S1 | C7  | C4         | 175.68(15)  |
| N1  | C3 | C5 | N3 | 163.49(18)  | C8 | N8 | N7  | C7         | 1.6(2)      |
| N1  | C1 | C2 | N2 | -8.4(3)     | C8 | N9 | N10 | O008       | 0.6(2)      |
| N7  | N8 | C8 | S1 | -0.6(2)     | C8 | N9 | N10 | O009       | 179.83(16)  |
| N7  | N8 | C8 | N9 | 178.53(16)  | C7 | S1 | C8  | N8         | -0.34(14)   |
| N3  | N4 | C6 | S2 | 1.8(2)      | C7 | S1 | C8  | N9         | -179.34(19) |
| N3  | N4 | C6 | N5 | -176.64(16) | C5 | S2 | C6  | N4         | -2.55(14)   |
| N10 | N9 | C8 | S1 | 3.7(3)      | C5 | S2 | C6  | N5         | 175.60(19)  |
| N10 | N9 | C8 | N8 | -175.19(16) | C5 | C3 | C4  | N2         | 168.64(17)  |
| C6  | S2 | C5 | N3 | 3.07(15)    | C5 | C3 | C4  | C7         | -15.5(3)    |
| C6  |    | S2 |    | C5          |    | C3 |     | 179.60(15) |             |

**Table S7:** Hydrogen Atom Coordinates ( $\text{\AA}\times 10^4$ ) and Isotropic Displacement Parameters ( $\text{\AA}^2\times 10^3$ ) for **3**.

| Atom | <i>x</i> | <i>y</i> | <i>z</i> | U(eq) |
|------|----------|----------|----------|-------|
| H4   | 2301.95  | 6939.27  | 3679.19  | 18    |
| H8   | 5712.95  | 5626.99  | 7771.18  | 21    |
| H1   | -1393.44 | 6616.17  | 7721.35  | 22    |
| H2   | 545.03   | 6584.24  | 9882.68  | 22    |
| H00A | 4460.21  | 7704.24  | 1493.62  | 29    |
| H00B | 5801.41  | 7238.88  | 1950.41  | 29    |
| H00C | 5760.04  | 7785.71  | 2990.46  | 29    |
| H00G | 7199.75  | 4980.82  | 4586.79  | 34    |
| H00H | 8576.67  | 4613.75  | 5693.83  | 34    |
| H00I | 8338.84  | 5387.7   | 5871.19  | 34    |
| H00D | 6508.4   | 6982.33  | 4922.26  | 41    |
| H00E | 6607.49  | 6372.99  | 4032.36  | 41    |
| H00F | 5785.92  | 6285.07  | 4910.02  | 41    |
| H00J | 8966.35  | 5160.06  | 8376.22  | 48    |
| H00K | 9101.04  | 4370.03  | 8271.08  | 48    |
| H00L | 8152.1   | 4668.13  | 8899.83  | 48    |

## NMR, IR Spectra, HRMS & TG-DSC plots for 2-7.

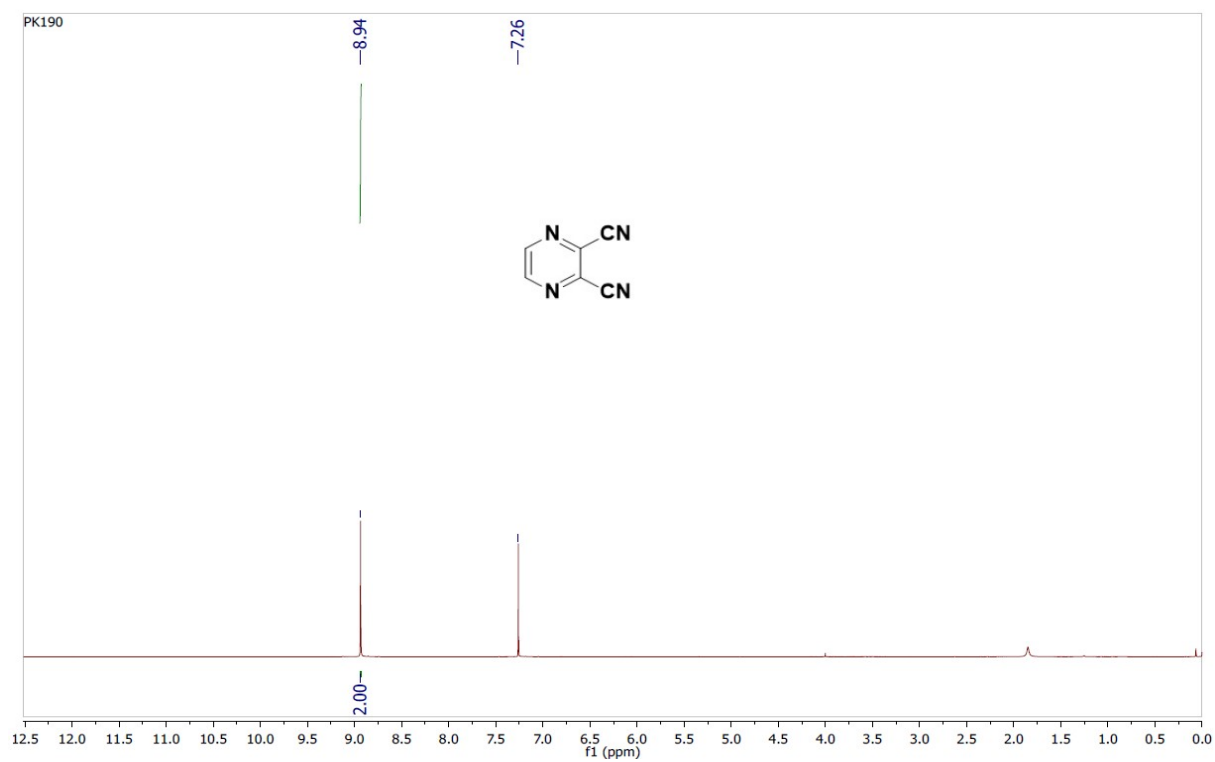

**Figure S2:**  $^1\text{H}$  NMR spectrum of compound **1** in  $\text{CDCl}_3$ .

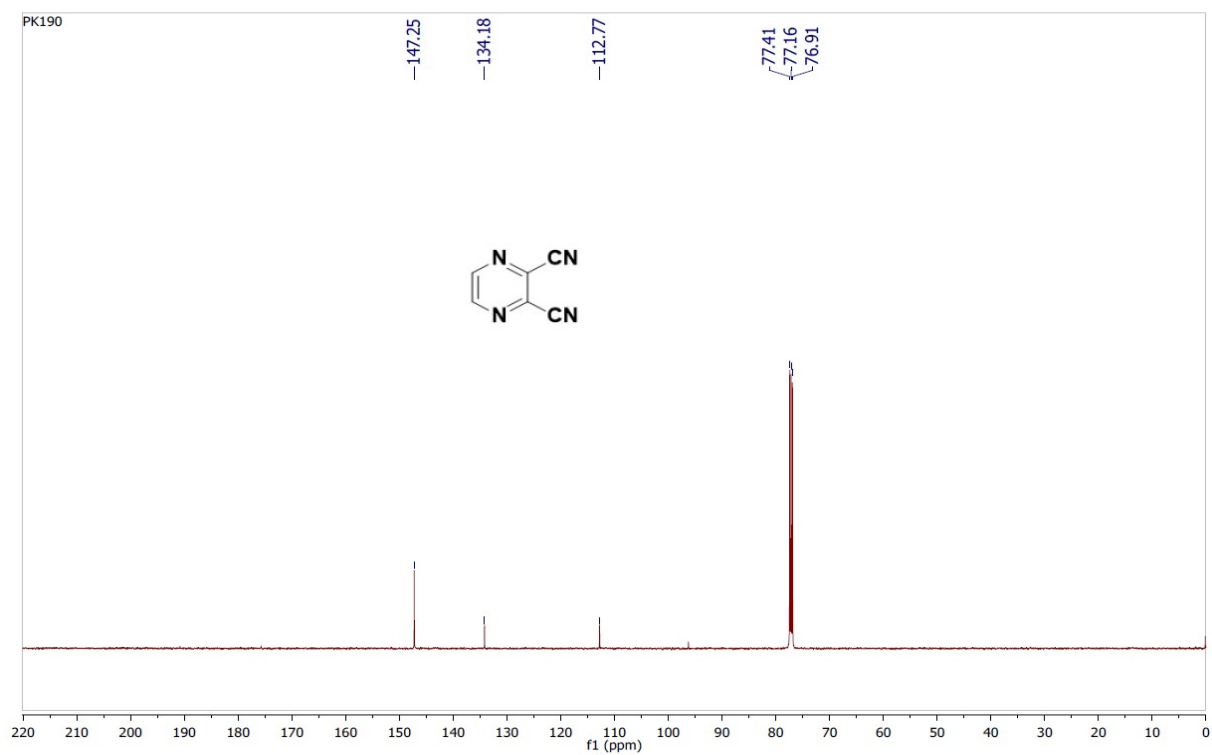

**Figure S3:**  $^{13}\text{C}$  NMR spectrum of compound **1** in  $\text{CDCl}_3$ .

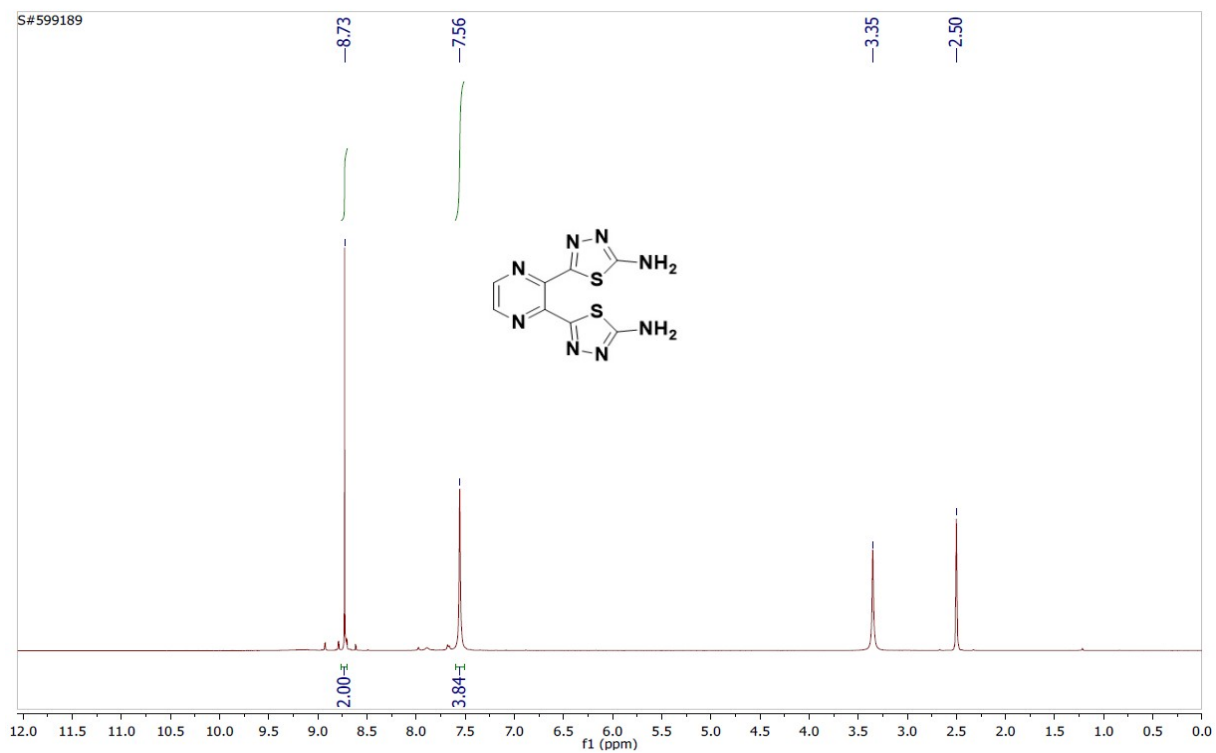

**Figure S4:**  $^1\text{H}$  NMR spectrum of compound **2** in  $\text{DMSO-}d_6$ .

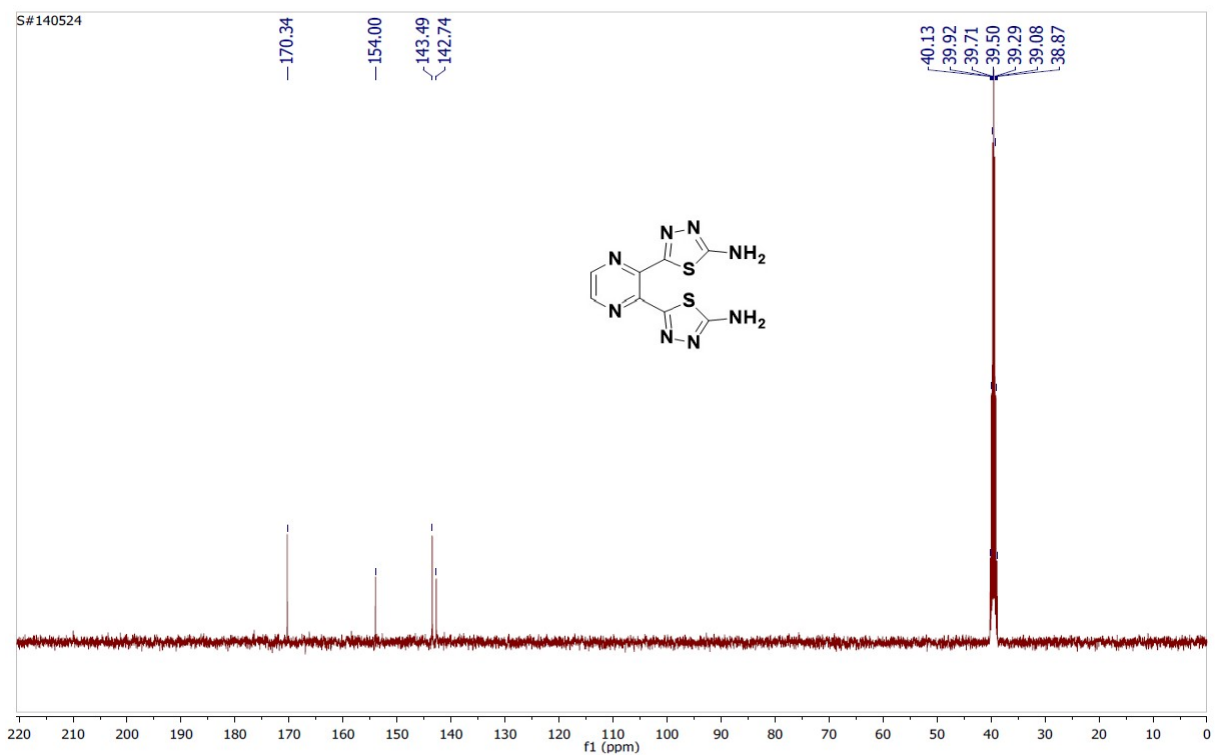

**Figure S5:**  $^{13}\text{C}$  NMR spectrum of compound **2** in  $\text{DMSO-}d_6$ .

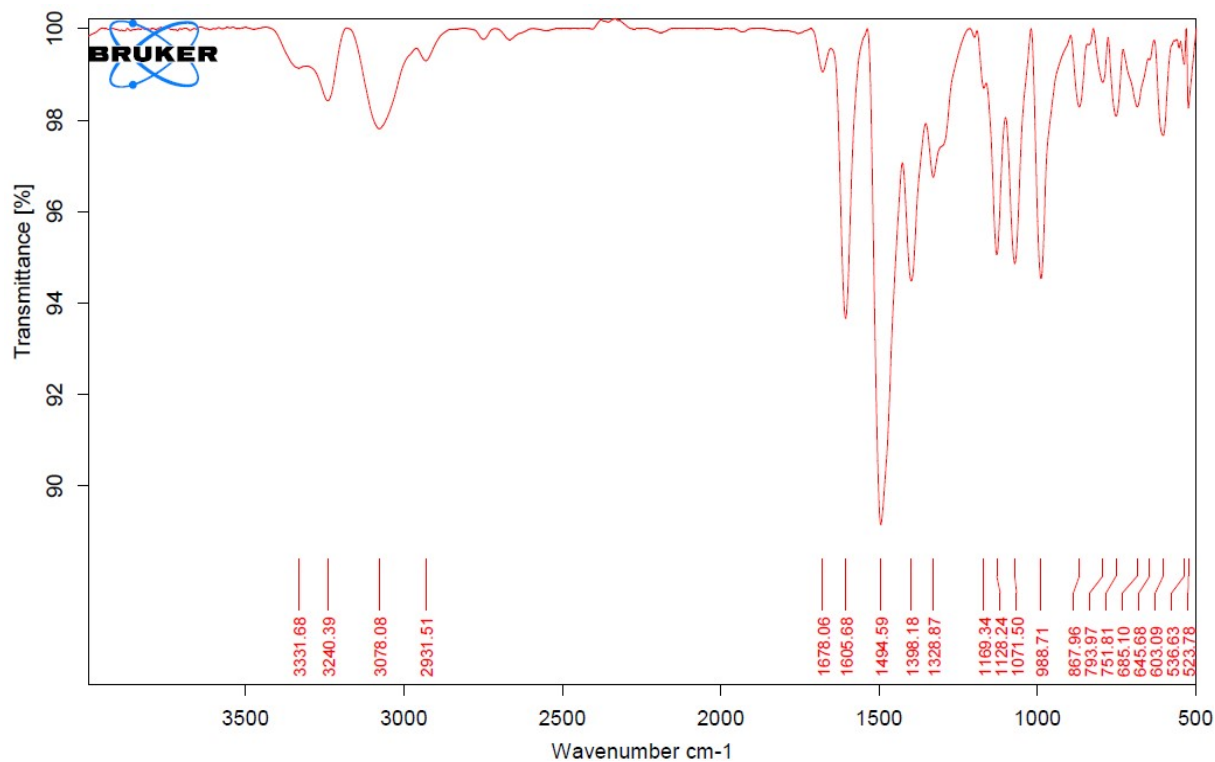

Figure S6: IR spectrum of compound 2.

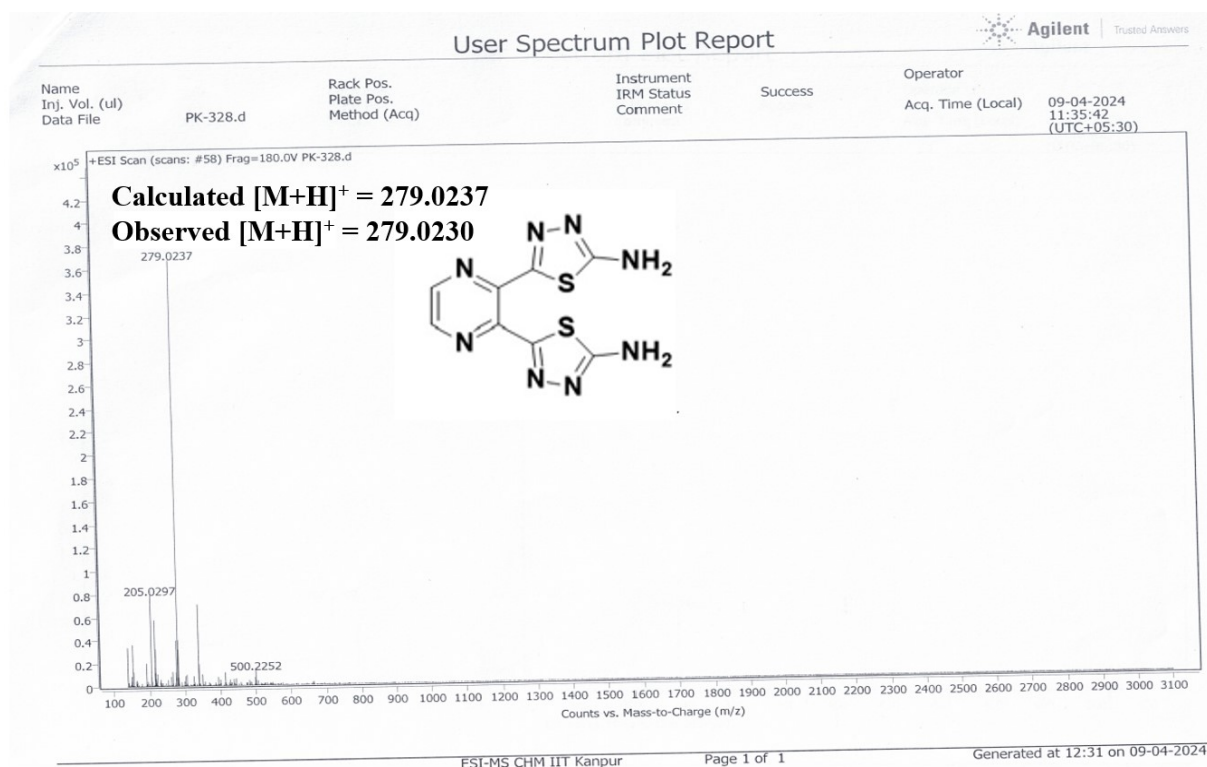

Figure S7: Mass spectrum of compound 2.

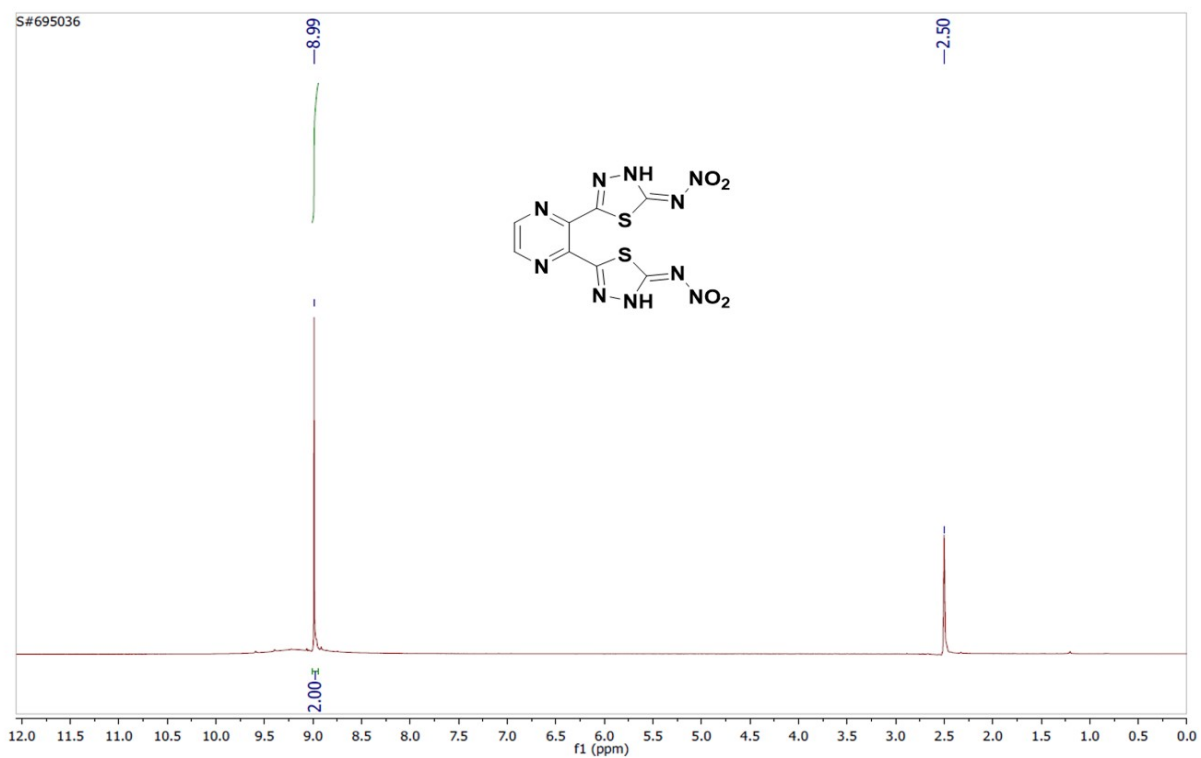

**Figure S8:**  $^1\text{H}$  NMR spectrum of compound **3** in  $\text{DMSO-}d_6$ .

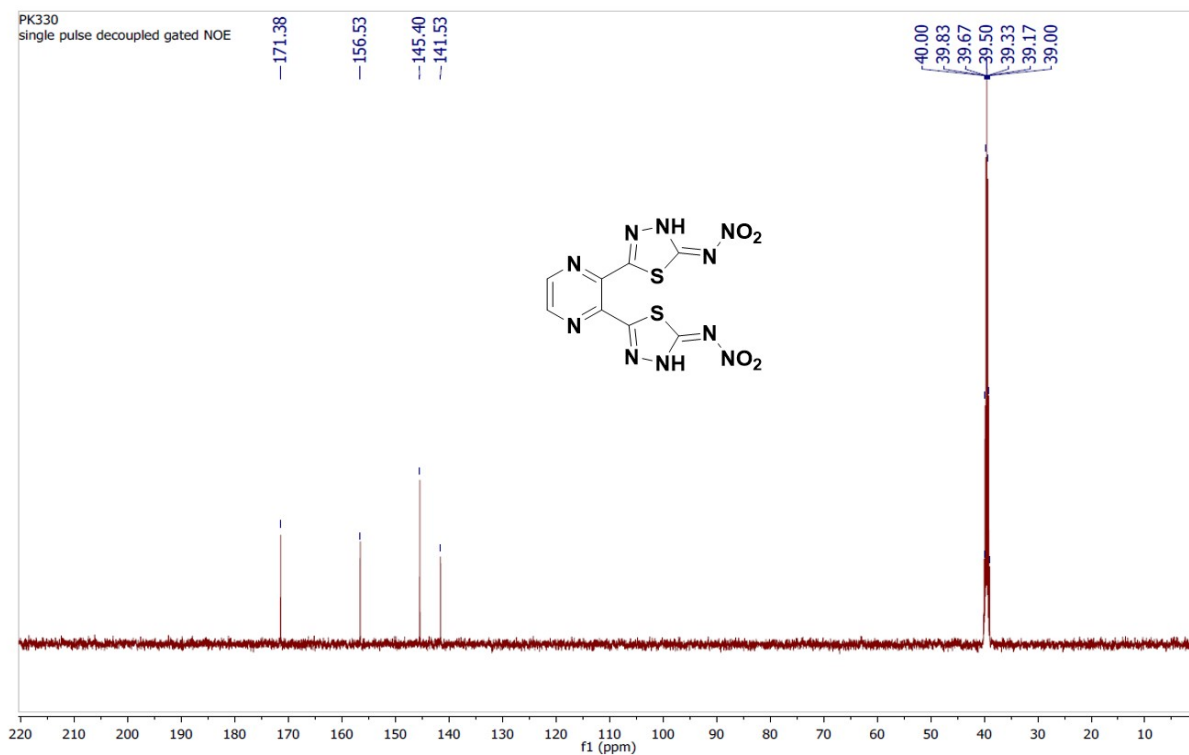

**Figure S9:**  $^{13}\text{C}$  NMR spectrum of compound **3** in  $\text{DMSO-}d_6$ .

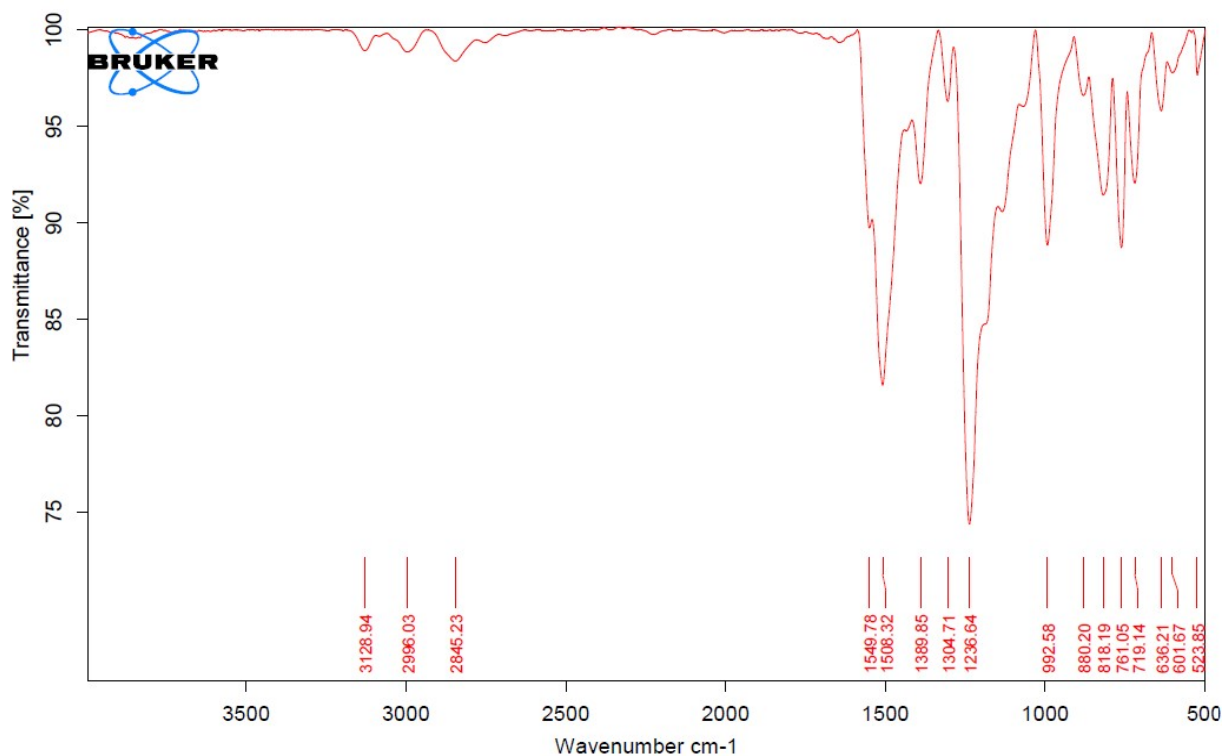

Figure S10: IR spectrum of compound 3.

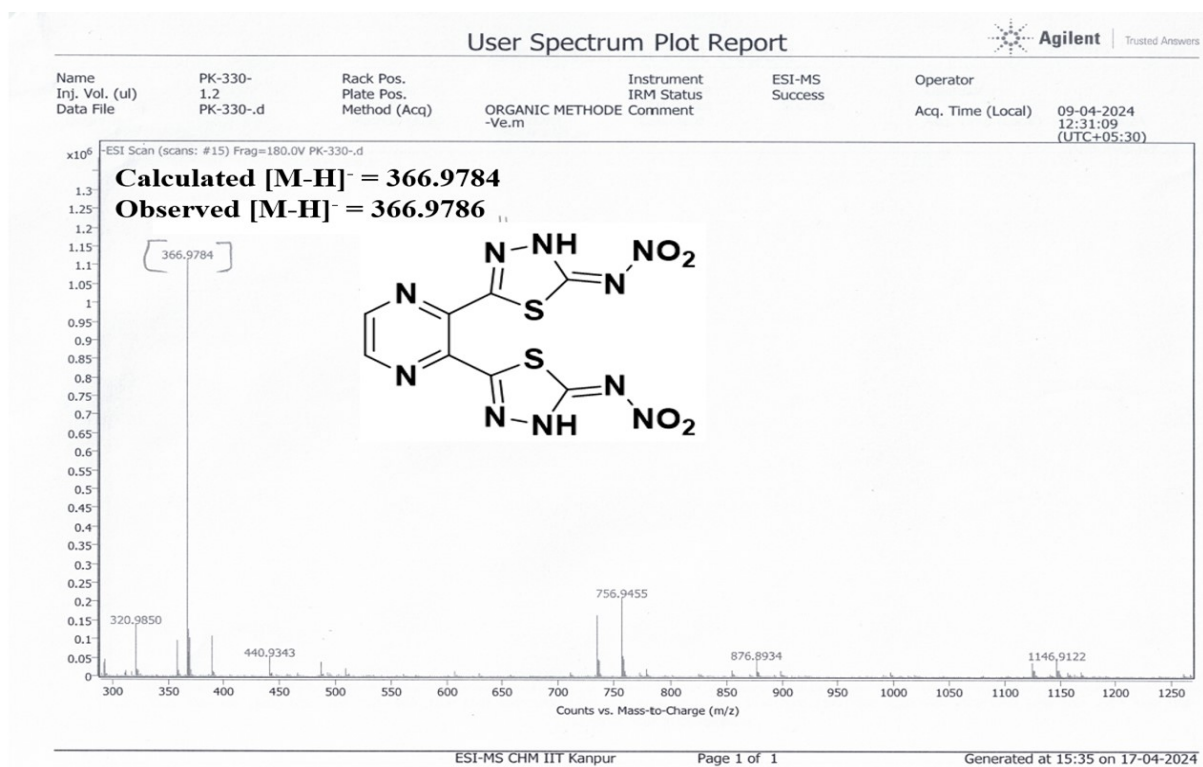

Figure S11: Mass spectrum of compound 3.

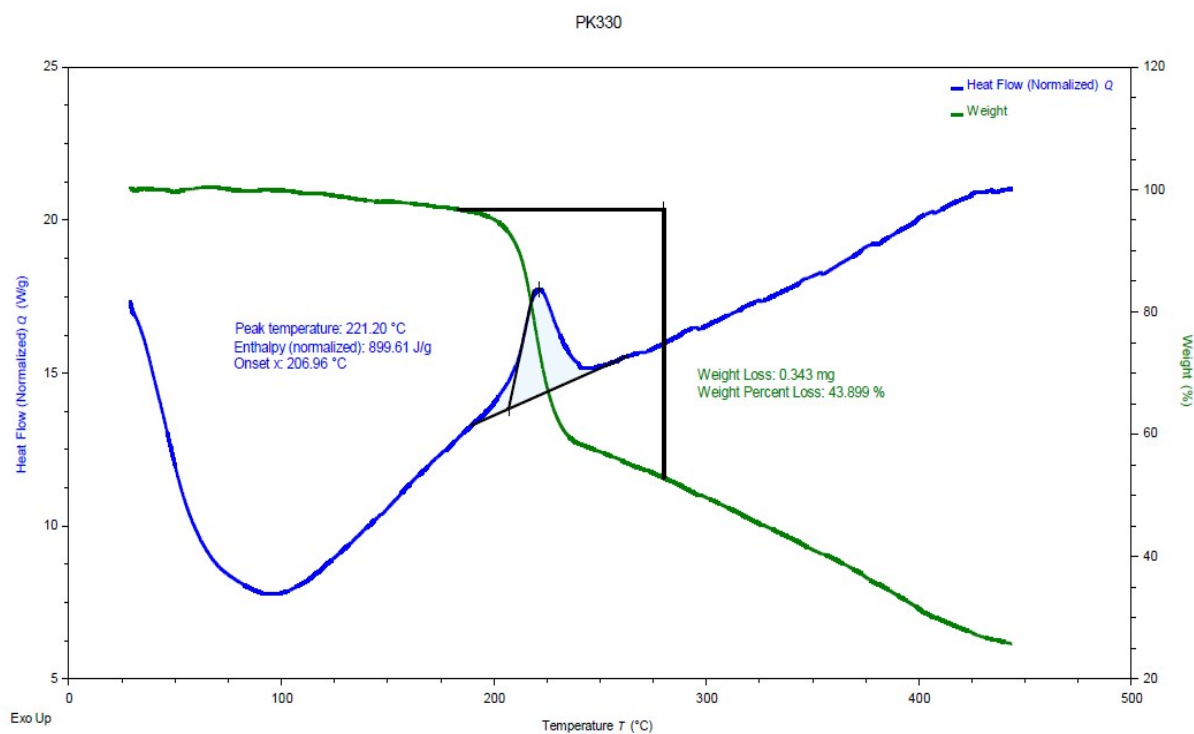

**Figure S12:** DSC spectrum of compound **3** at heating rate 5 °C min<sup>-1</sup>.

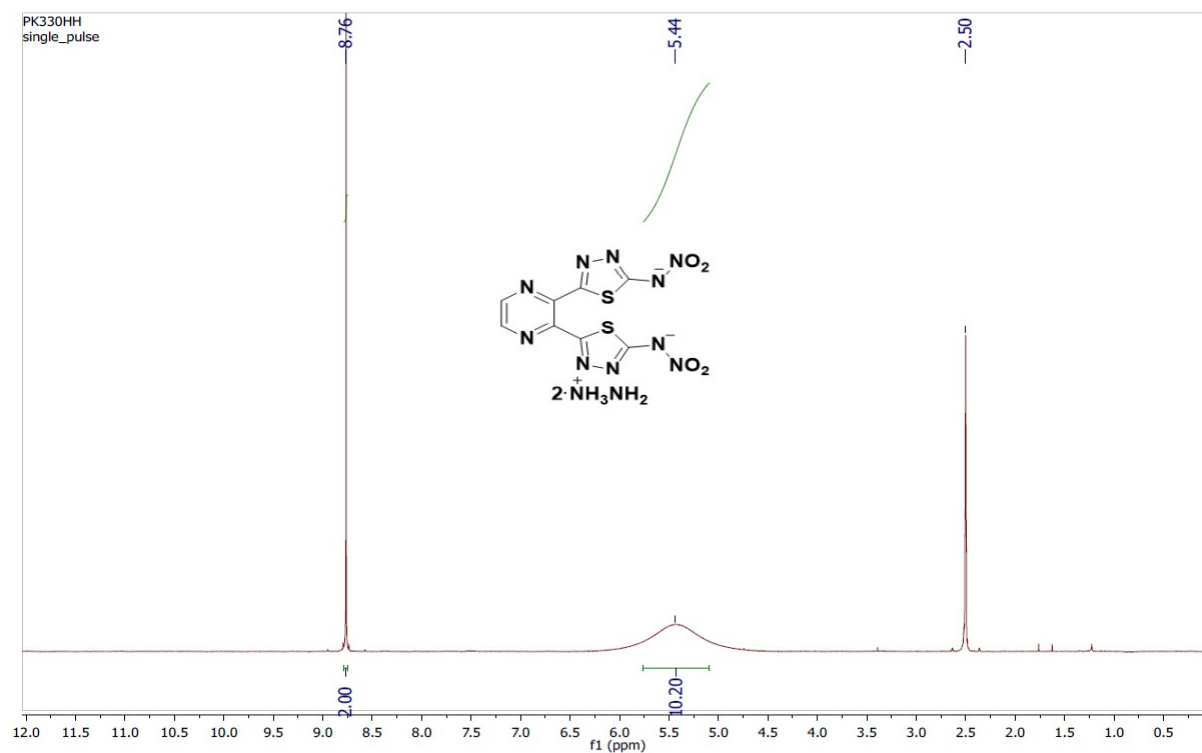

**Figure S13:** <sup>1</sup>H NMR spectrum of compound **4** in DMSO-*d*<sub>6</sub>.

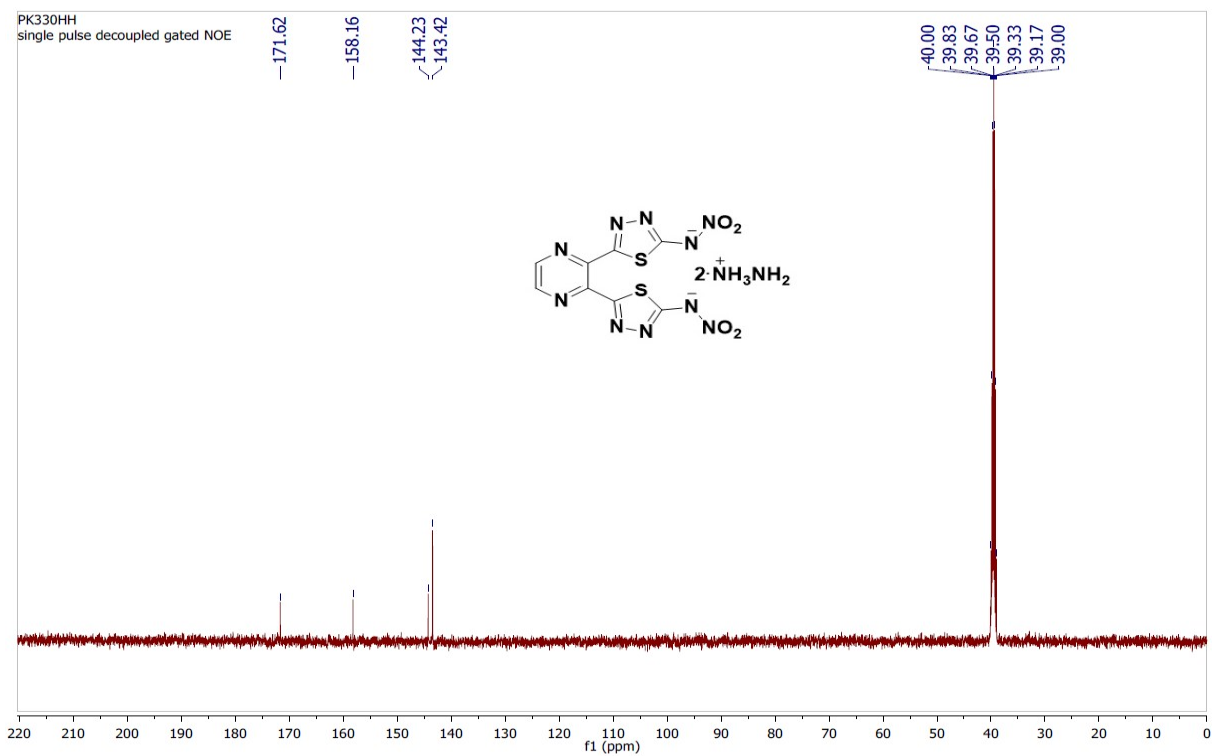

Figure S14:  $^{13}\text{C}$  NMR spectrum of compound 4 in  $\text{DMSO-}d_6$ .

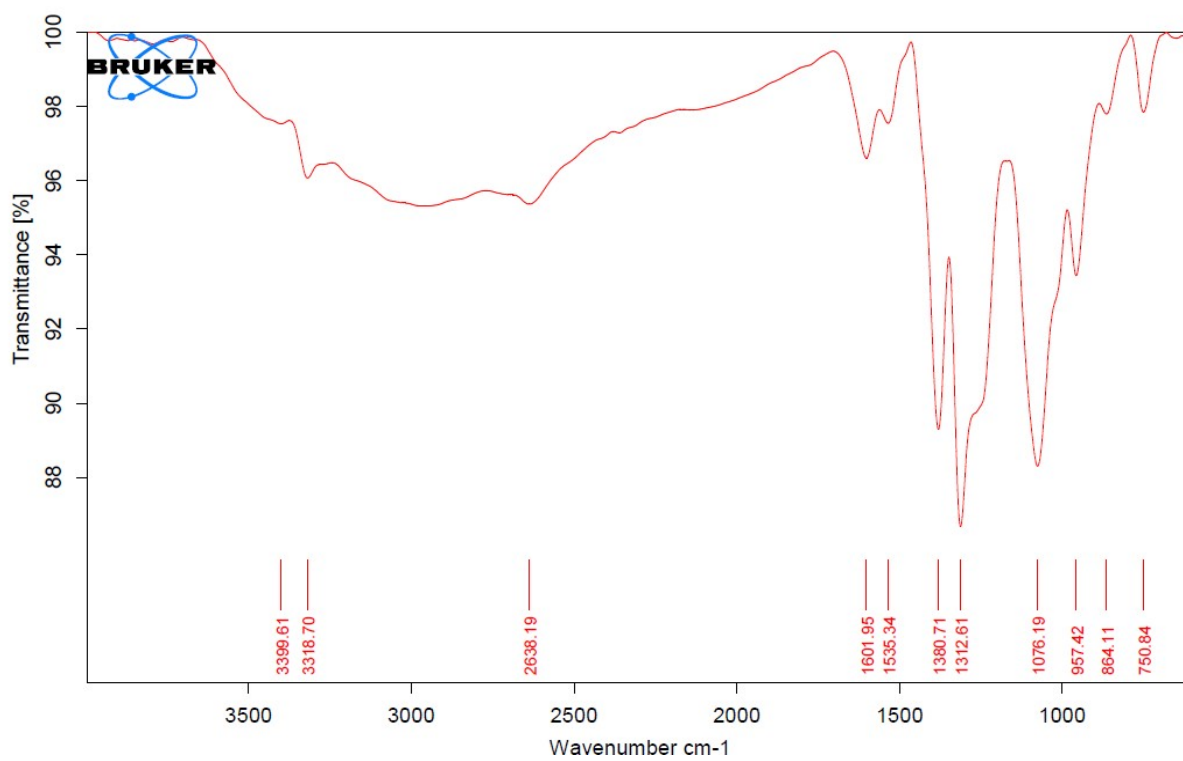

Figure S15: IR spectrum of compound 4.



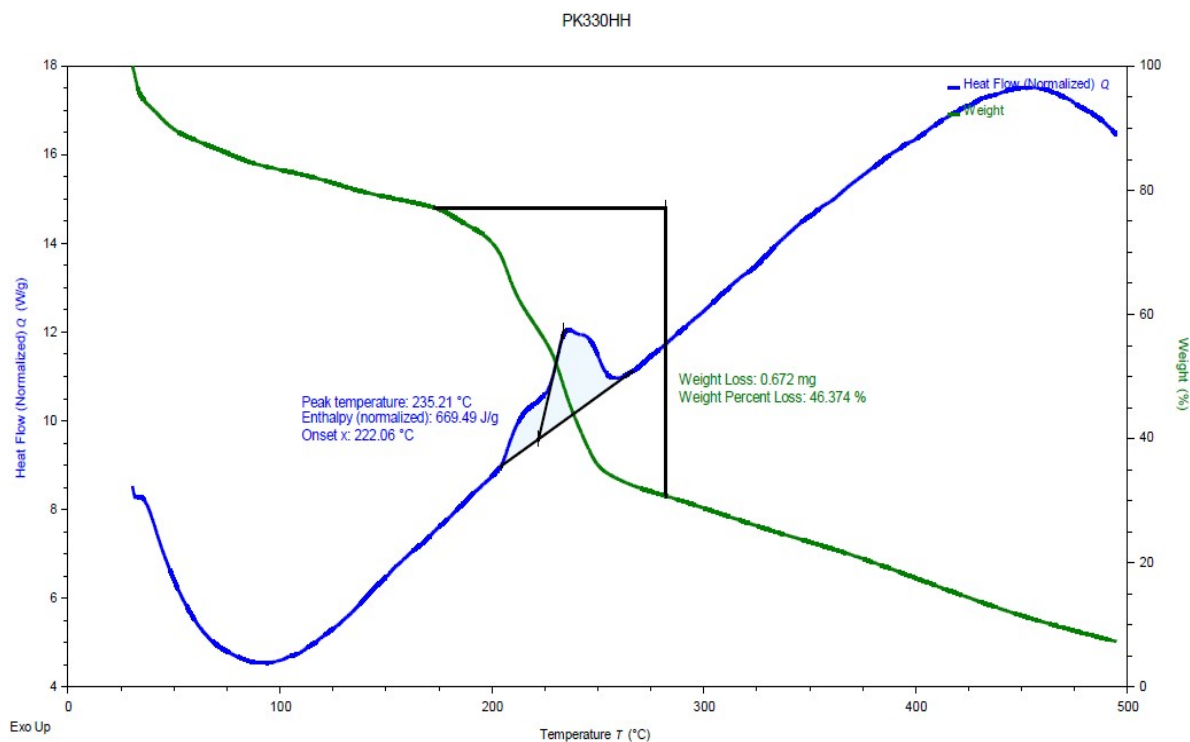

**Figure S16:** DSC spectrum of compound **4** at heating rate 5 °C min<sup>-1</sup>.

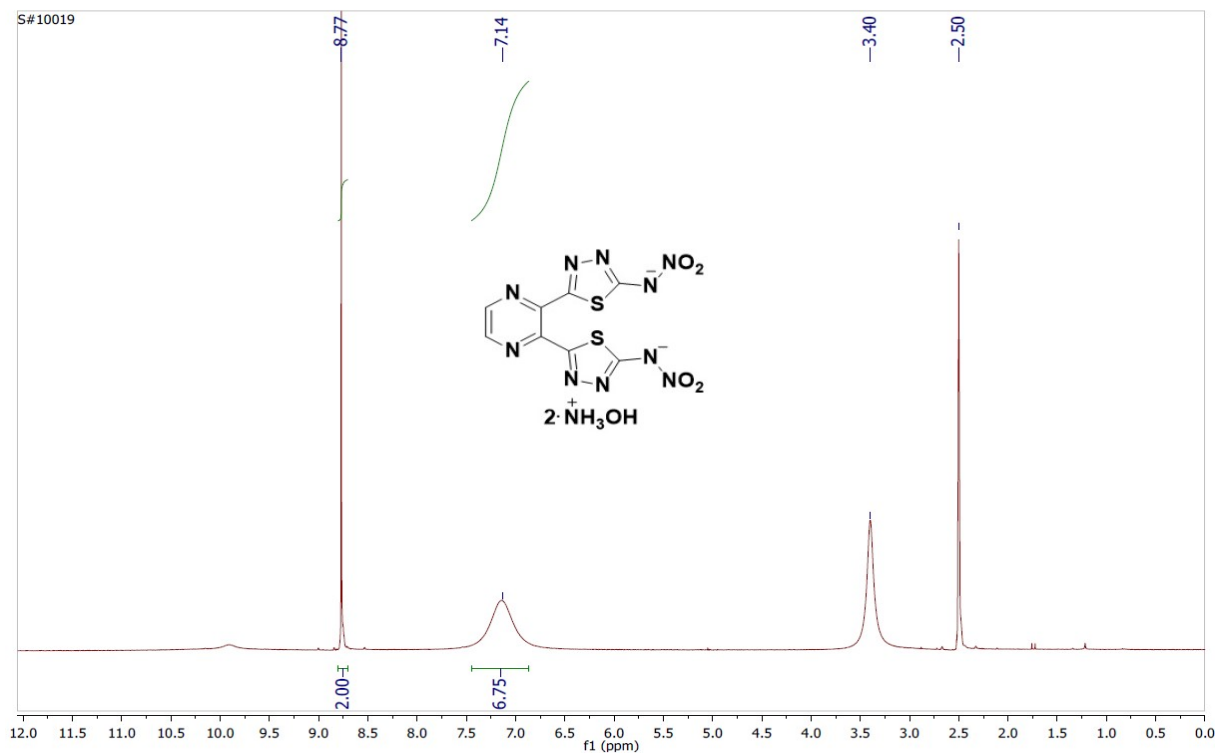

**Figure S17:** <sup>1</sup>H NMR spectrum of compound **5** in DMSO-*d*<sub>6</sub>.

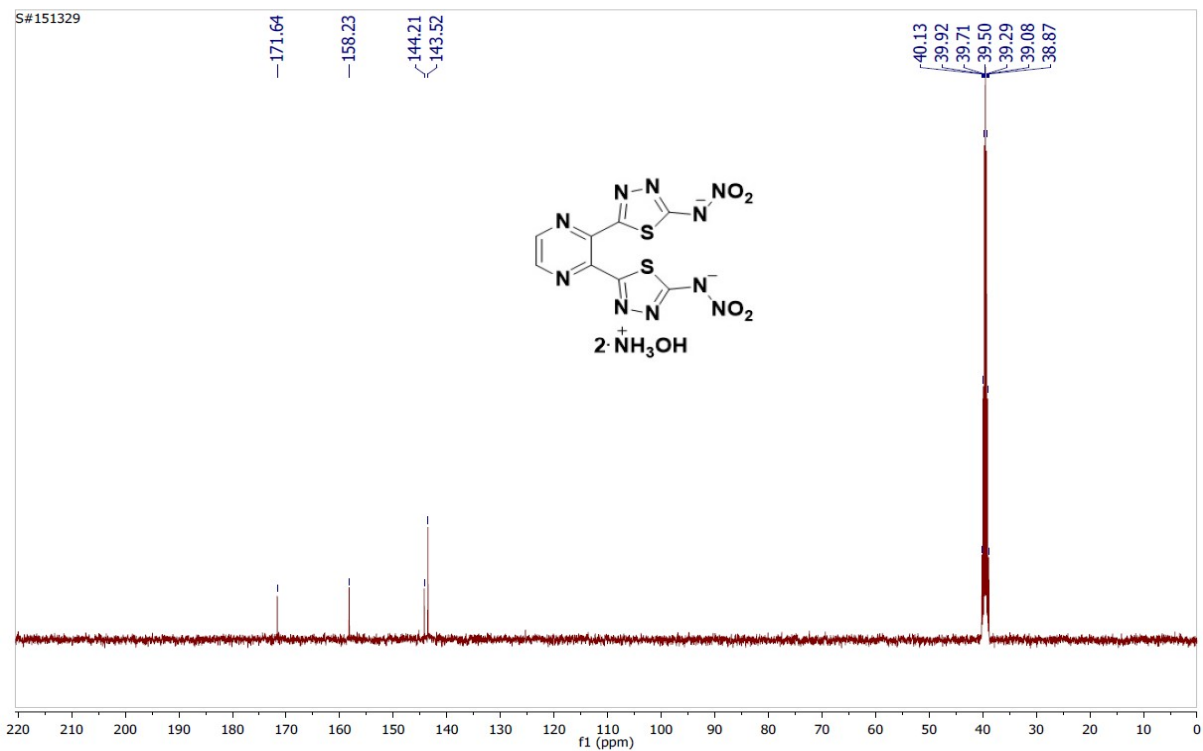

Figure S18:  $^{13}\text{C}$  NMR spectrum of compound 5 in  $\text{DMSO-}d_6$ .

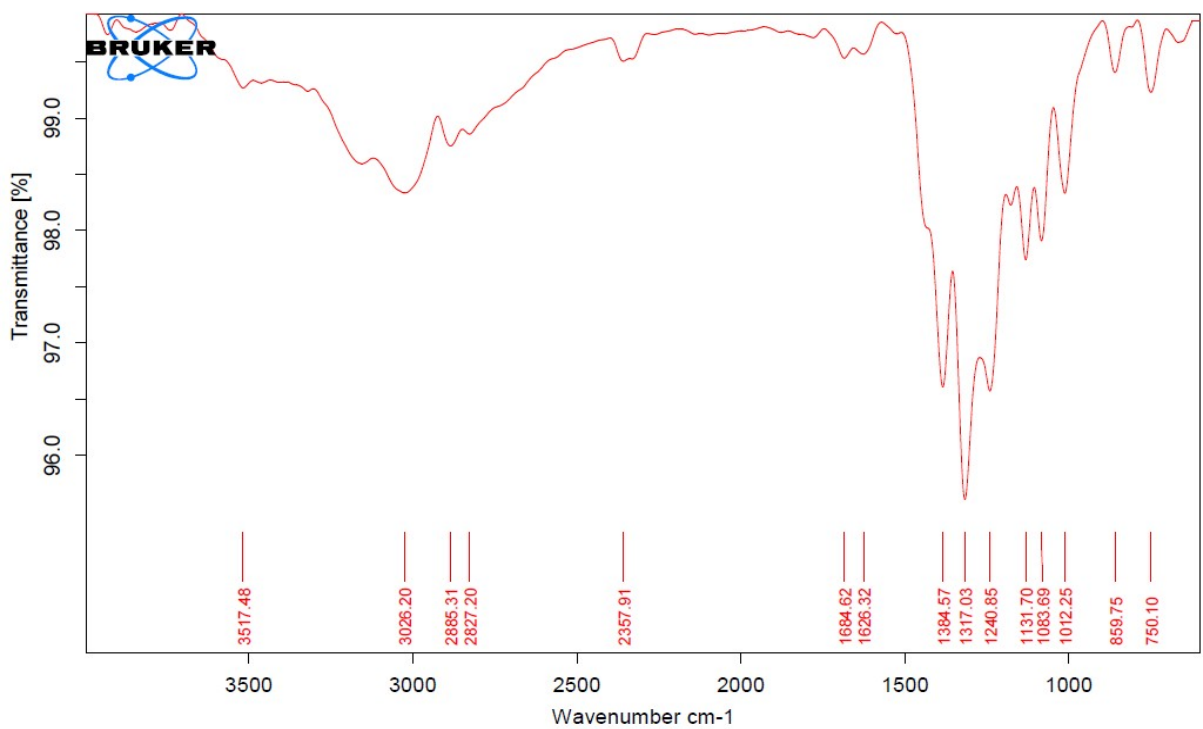

Figure S19: IR spectrum of compound 5.

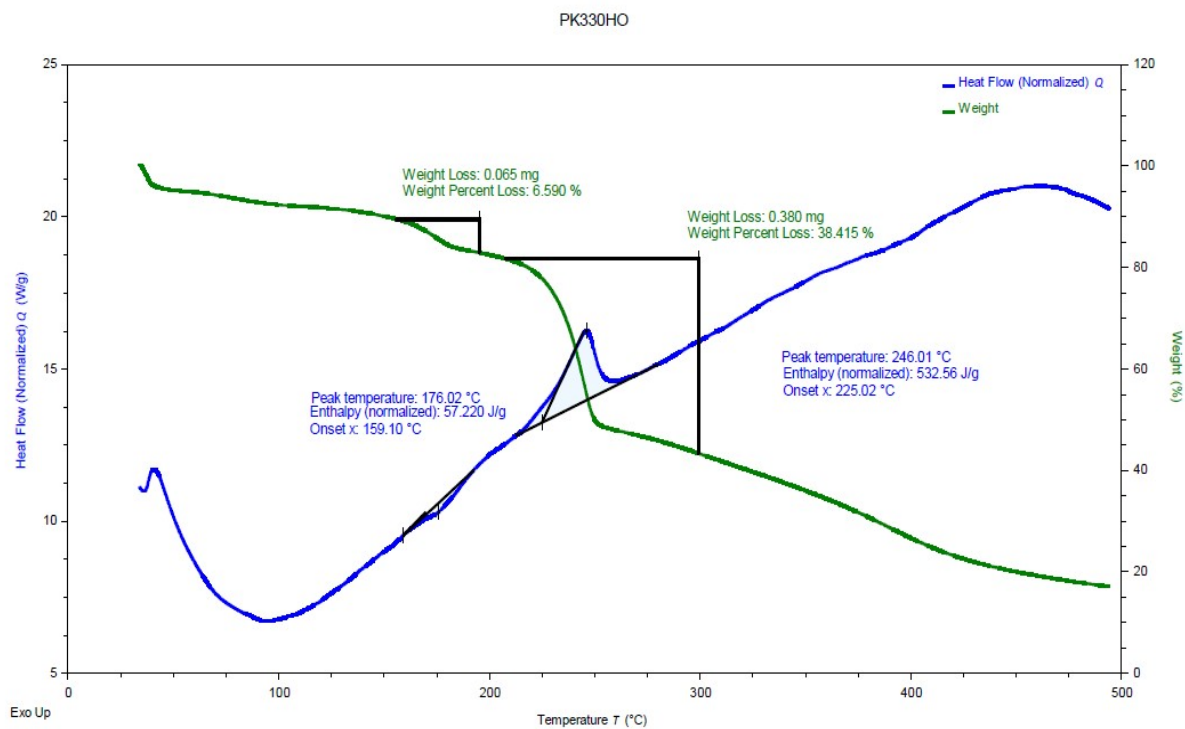

**Figure S20:** DSC spectrum of compound **5** at heating rate 5 °C min<sup>-1</sup>.

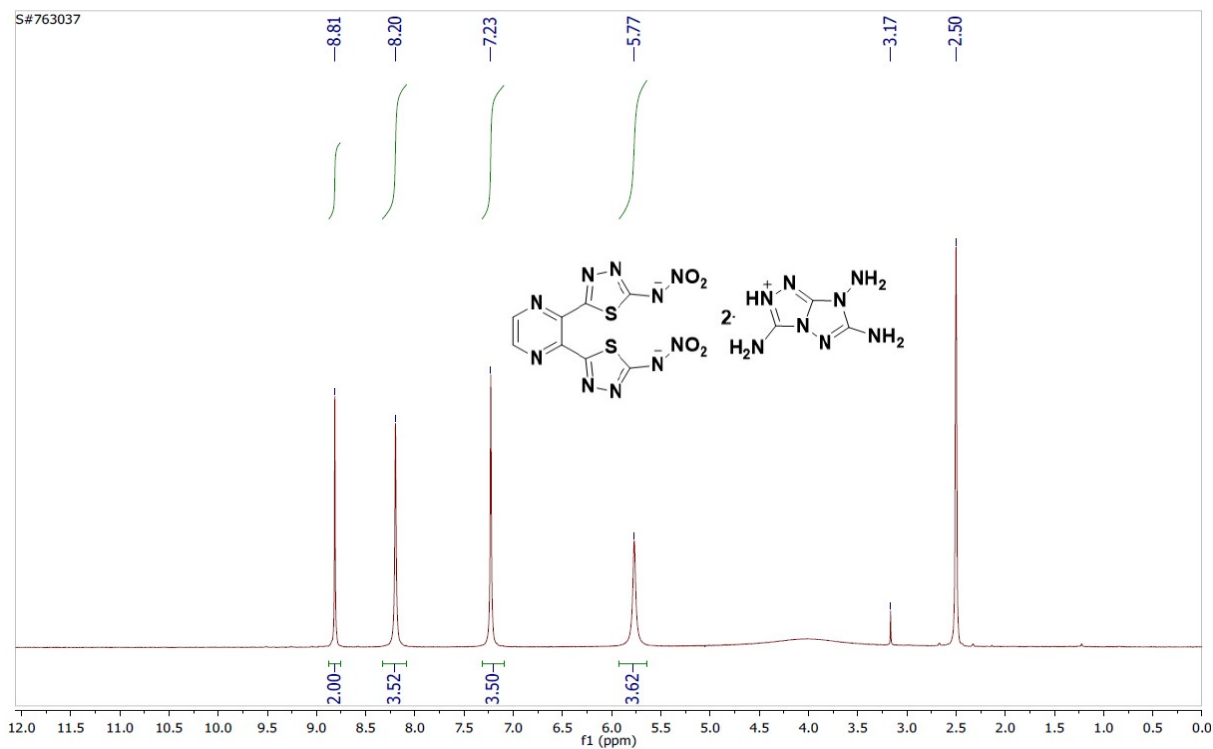

**Figure S21:** <sup>1</sup>H NMR spectrum of compound **6** in DMSO-*d*<sub>6</sub>.

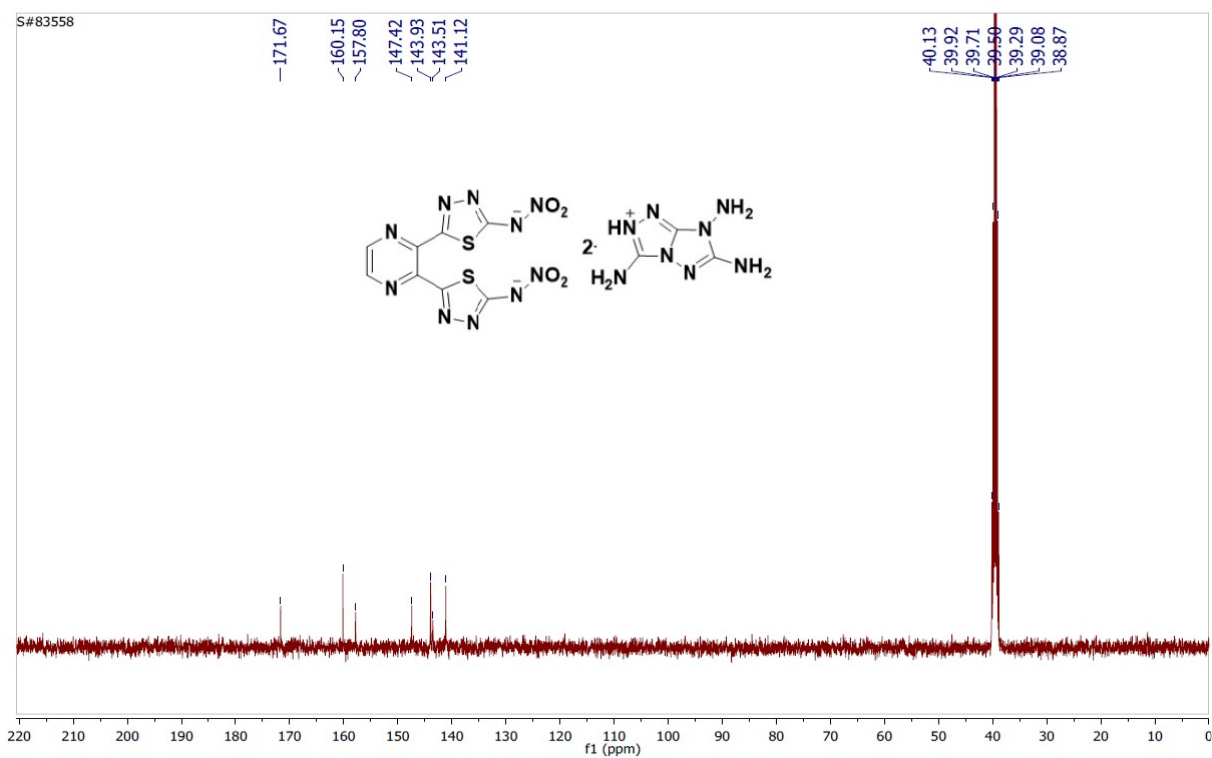

Figure S22:  $^{13}\text{C}$  NMR spectrum of compound **6** in  $\text{DMSO-}d_6$ .

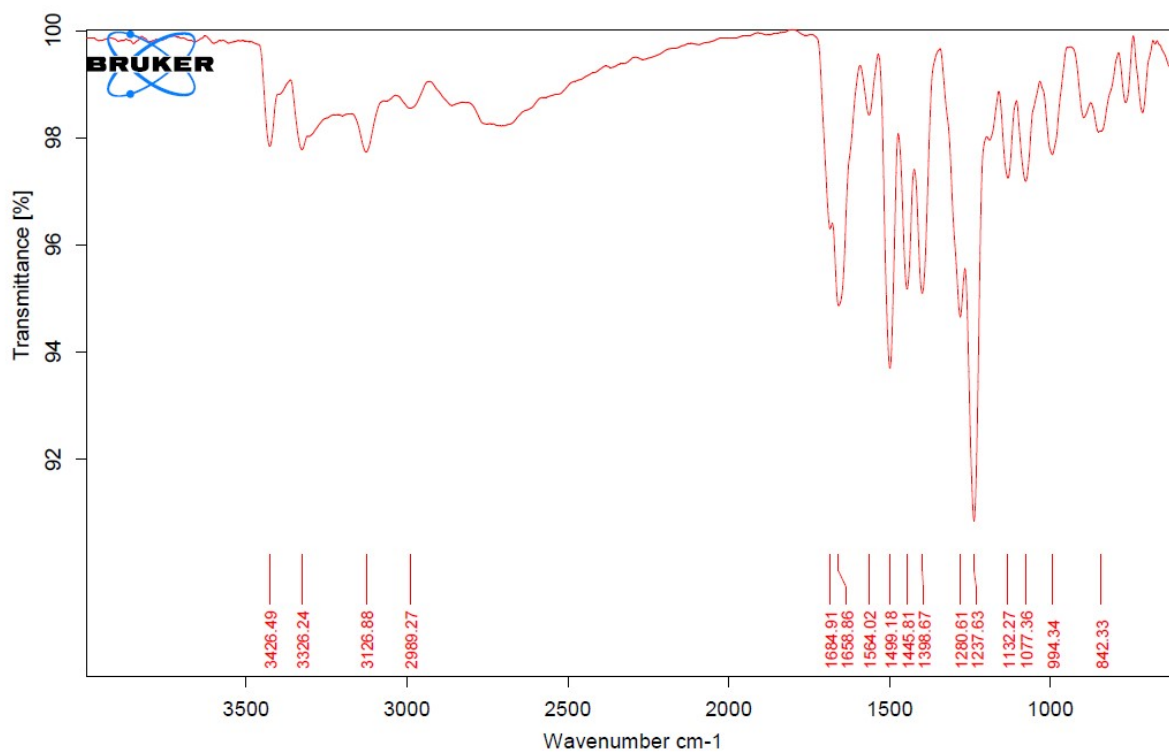

Figure S23: IR spectrum of compound **6**.

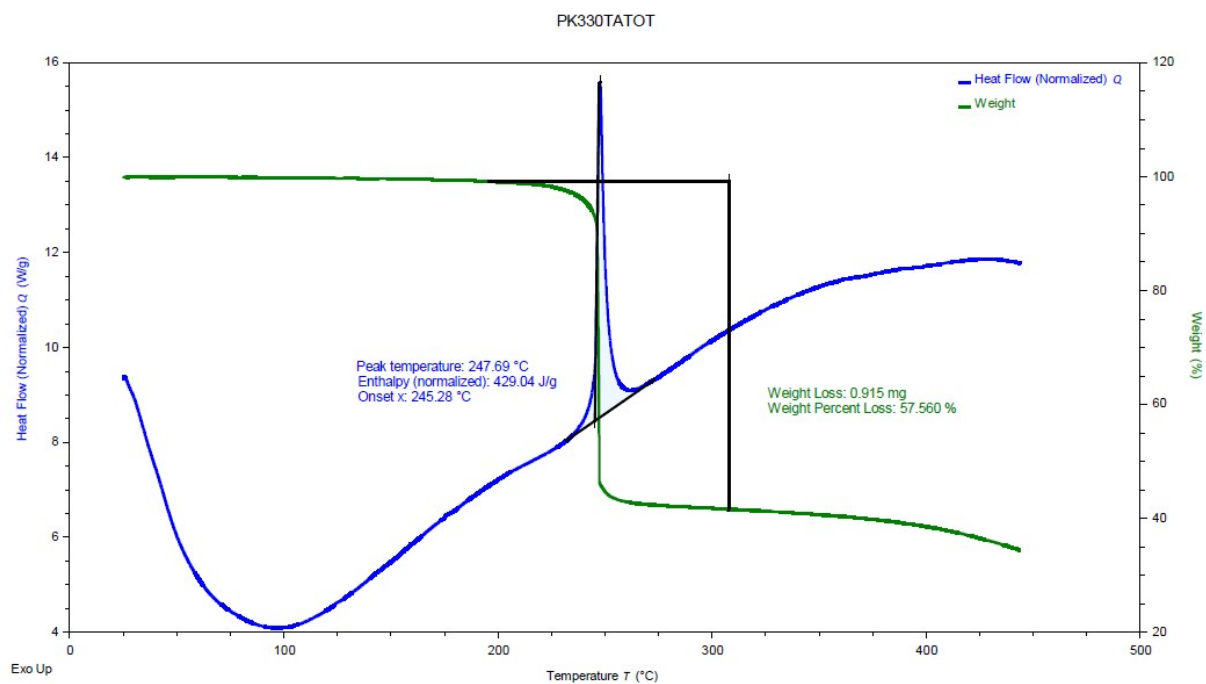

**Figure S24.** DSC spectrum of compound **6**.

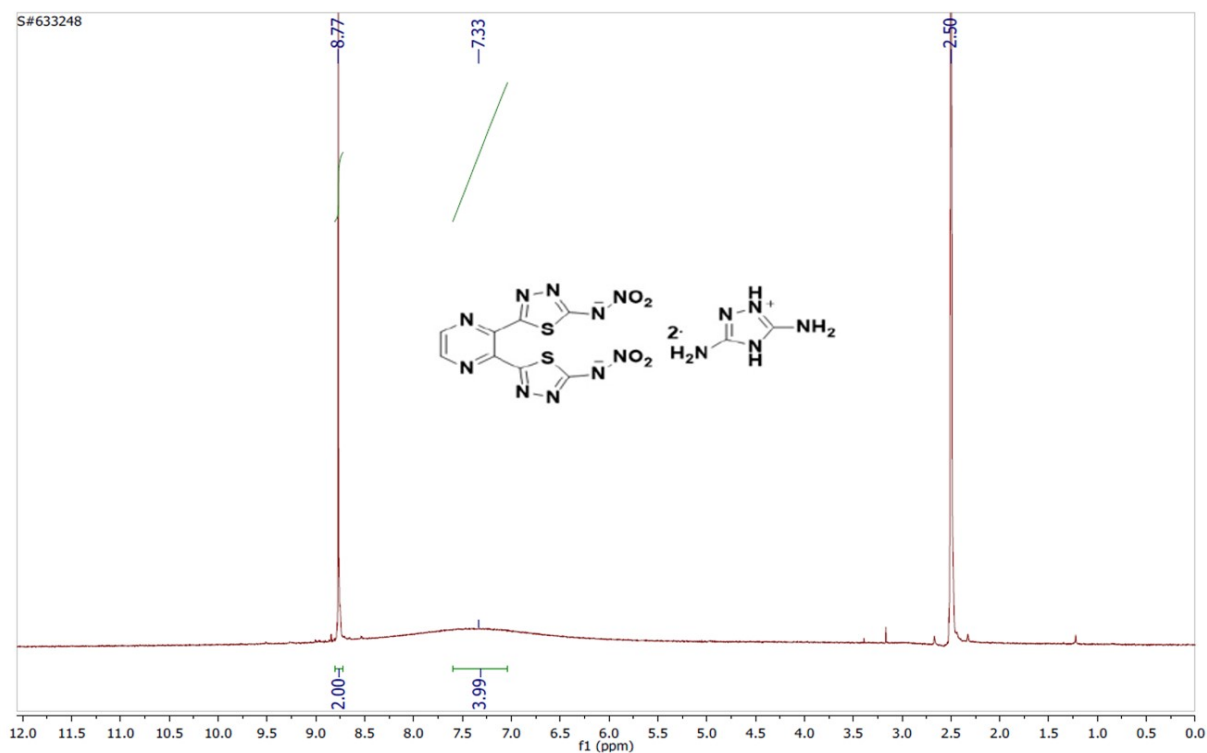

**Figure S25:**  $^1\text{H}$  NMR spectrum of compound **7** in  $\text{DMSO-}d_6$ .

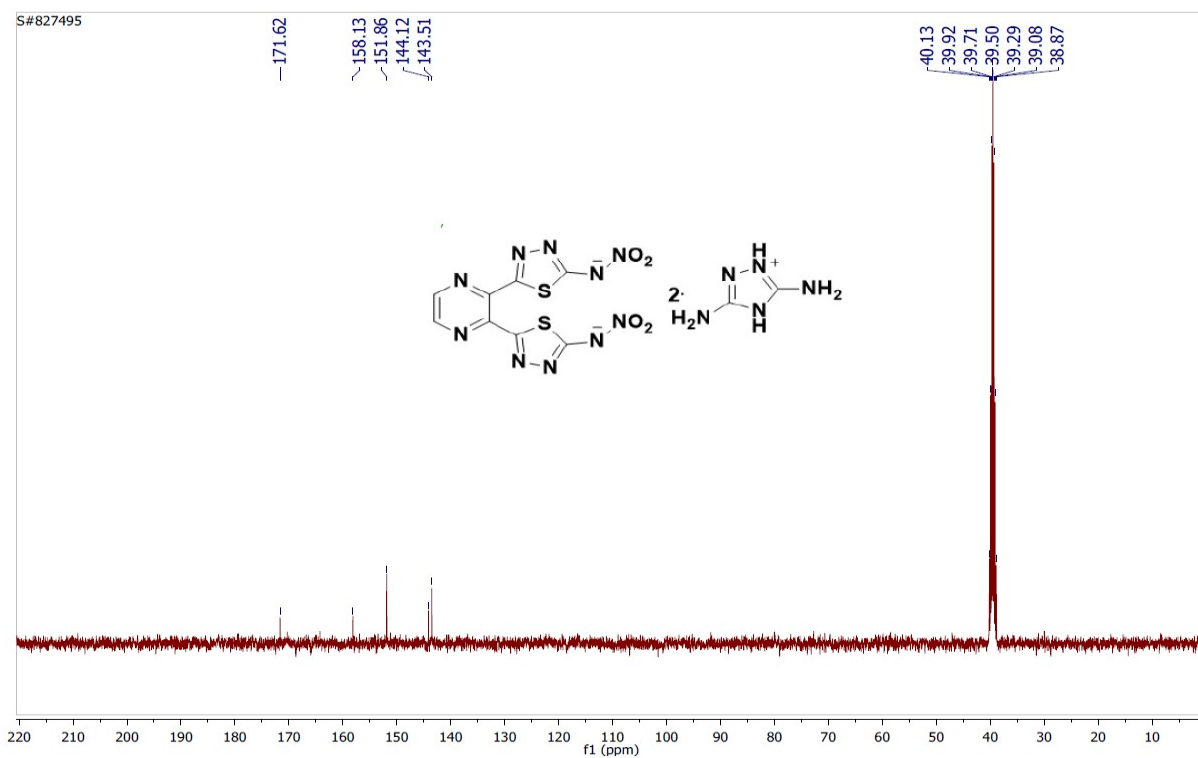

Figure S26:  $^{13}\text{C}$  NMR spectrum of compound 7 in  $\text{DMSO-}d_6$ .

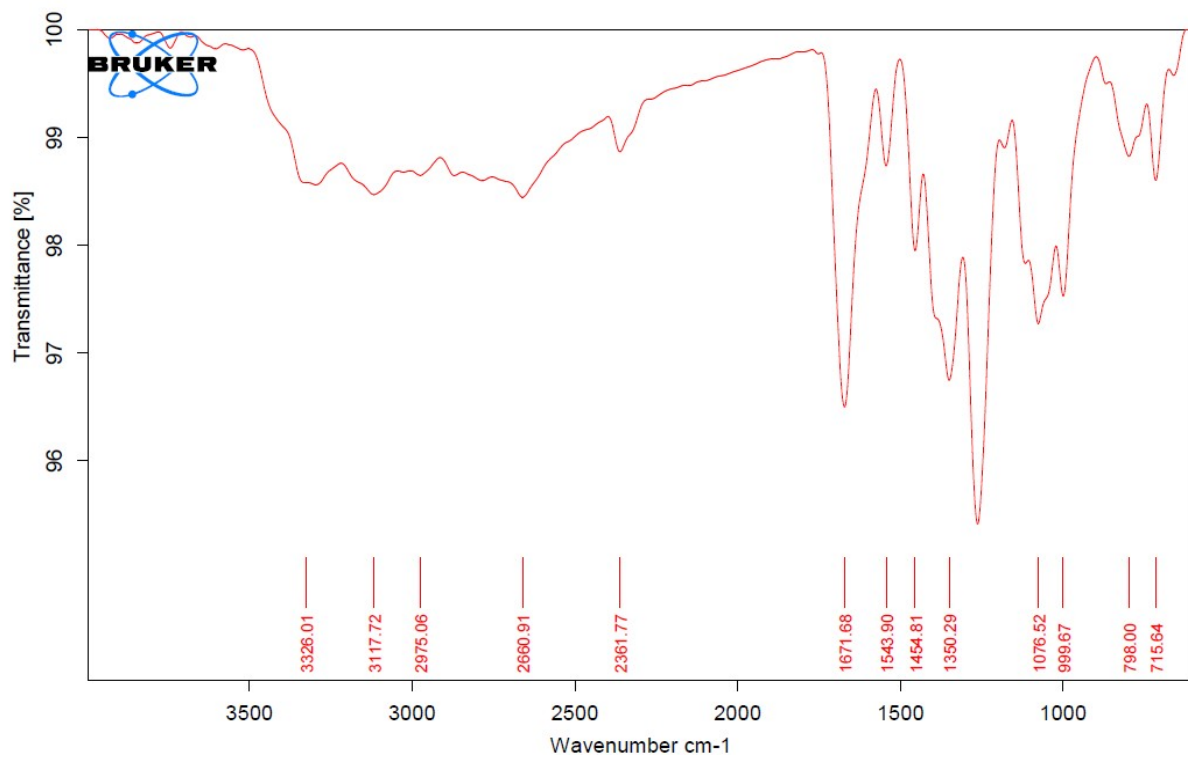

Figure S27: IR spectrum of compound 7.

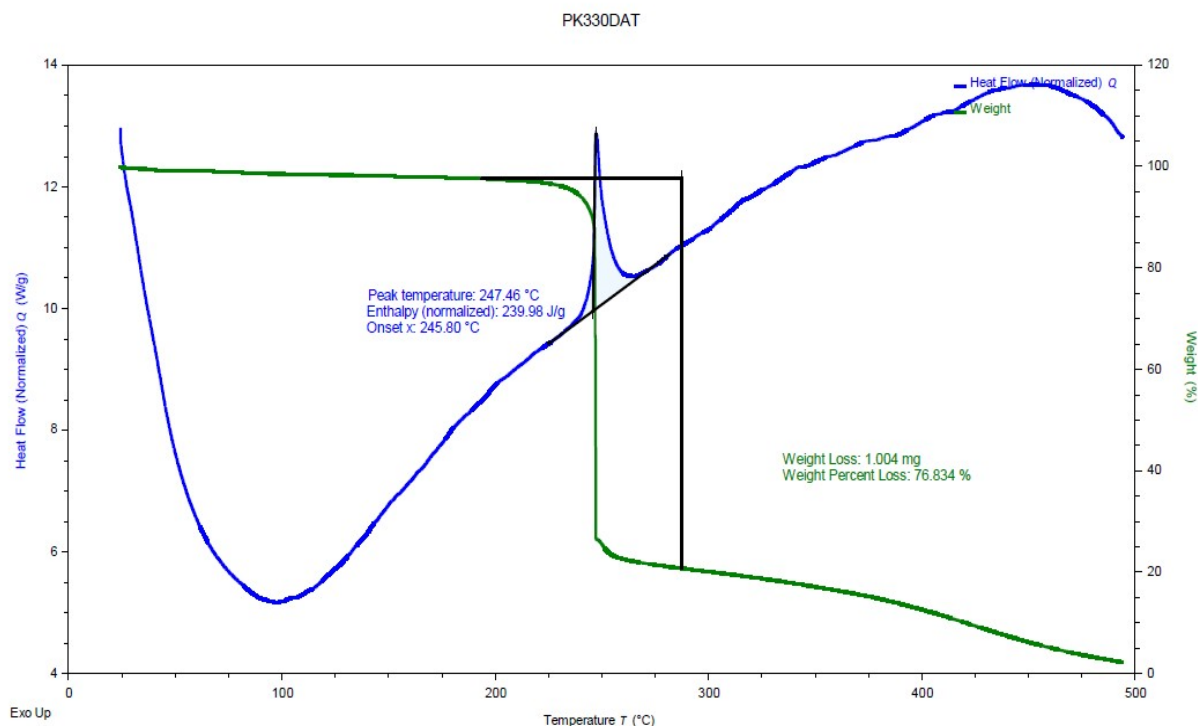

**Figure S28:** DSC spectrum of compound **7**.

### Computational Details:

Computations were carried out using the Gaussian 09 program suite.<sup>2</sup> The structure optimizations are performed with M06-2X/def2-TZVPP level of theory and characterized to be true local energy minima on the potential energy surface and no imaginary frequencies were found. Heat of formation (HOF) is a measure of energy content of an energetic material that can decompose, ignite and explode by heat or impact. It enters into the calculation of explosive and propellant properties such as detonation velocity, detonation pressure, heat of detonation and specific impulse. However, it is impractical to determine the HOF of novel energetic materials because of their unstable intermediates and unknown combustion mechanism. Gas-phase heats of formation for neutral compound and anion were calculated using the isodesmic reaction approach (see **Figure S29**). Calculated total energies and related data for reference compounds and target compounds is listed in Tables S8 and S9. The usage of the  $\text{HOF}_{\text{Gas}}$  in the calculation of detonation properties slightly overestimates the values of

detonation velocity and detonation pressure, and hence, the solid phase HOF ( $HOF_{Solid}$ ) has been calculated which can efficiently reduce the errors. The  $HOF_{Solid}$  is calculated as the difference between  $HOF_{Gas}$  and heat of sublimation ( $HOF_{Sub}$ ) as,

$$HOF_{Solid} = HOF_{Gas} - HOF_{Sub} \quad (1)$$

The heat of sublimation ( $HOF_{Sub}$ ), which is required to convert the  $HOF_{Gas}$  to the  $HOF_{Solid}$ , was calculated from Equation (2),<sup>3</sup>

$$HOF_{Sub} = 0.000267 A^2 + 1.650087 (v\sigma_{tot}^2)^{0.5} - 2.966078 \quad (2)$$

Where A represents the surface area of the 0.001 electrons/bohr<sup>3</sup> isosurface of electronic density,  $v$  denotes the degree of balance between the positive and negative surface potentials, and  $\sigma_{tot}^2$  is the electrostatic potential variance. These molecular surface properties were obtained using the Multiwfn program<sup>4</sup> and listed in Table S10.

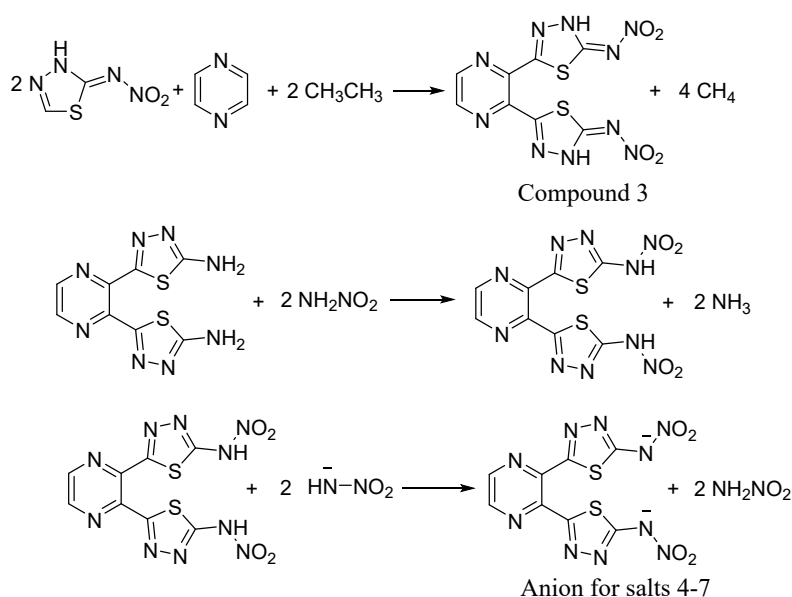

**Figure S29.** Designed isodesmic reactions for the prediction of gas-phase heats of formation.

Based on the Born–Haber cycle (shown in **Figure S30**), the heat of formation of an ionic compound can be simplified by subtracting the lattice energy of the salt ( $H_L$ ) from the total heat of formation of salt (see Table S11) *i.e.* sum of the heats of formation of the cation and anion as shown in equation (3).



$$\text{HOF (salt, 298 K)} = \text{HOF (cation, 298 K)} + \text{HOF (anion, 298 K)} - H_L \quad (3)$$

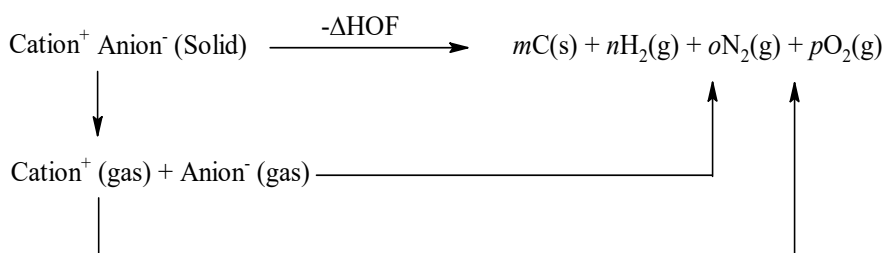

**Figure S30.** Born-Haber cycle for the formation of energetic salts.

Lattice potential energy is the energy associated with the process in which a crystalline solid lattice,  $M_pX_q$  is converted into its constituent gaseous ions,  ${}_pM^{q+}(\text{g})$  and  ${}_qX^{p-}(\text{g})$ . The lattice energy can be predicted with reasonable accuracy by using Jenkins' equation (4).<sup>5</sup>

$$H_L = U_{\text{POT}} + [p(\frac{n_M}{2} - 2) + q(\frac{n_X}{2} - 2)]RT \quad (4)$$

where  $nM$  and  $nX$  depend on the nature of the ions  $M_p^+$  and  $X_q^-$ , respectively, and are equal to 3 for monoatomic ions, 5 for linear polyatomic ions, and 6 for nonlinear polyatomic ions. When lattice potential energy ( $U_{\text{POT}}$ ), is incorporated and made part of a Born–Haber cycle, it needs to be converted into a lattice enthalpy term. This lattice enthalpy ( $H_L$ ) involves correction of the  $U_{\text{POT}}$  term by an appropriate number of  $RT$  terms.

**Table S8.** Calculated total energies at 298K ( $E_0$ ), zero-point energies (ZPE), and thermal corrections ( $H_T$ ) and experimental  $\text{HOF}_{\text{gas}}$  of reference compounds used isodesmic reaction at the M06-2X/def2-TZVPP level.

| Compd.                                                                              | $E_0$ (a.u.) | ZPE (au) | $H_T$ (au) | $\text{HOF}_{\text{gas}}$ (kJ/mol) |
|-------------------------------------------------------------------------------------|--------------|----------|------------|------------------------------------|
| CH <sub>4</sub>                                                                     | -40.453065   | 0.0449   | 0.0038     | -74.8                              |
| CH <sub>3</sub> NO <sub>2</sub>                                                     | -244.955044  | 0.0506   | 0.0053     | -81                                |
| NH <sub>3</sub>                                                                     | -56.513648   | 0.0345   | 0.0038     | -45.94                             |
| NH <sub>2</sub> NO <sub>2</sub>                                                     | -260.984584  | 0.0393   | 0.0042     | -6                                 |
| NHNO <sub>2</sub> Anion                                                             | -260.458232  | 0.0271   | 0.0042     | -103.24 <sup>a</sup>               |
| CH <sub>3</sub> CH <sub>3</sub>                                                     | -79.727235   | 0.075    | 0.0045     | -84                                |
| CH <sub>3</sub> Anion                                                               | -39.782152   | 0.0285   | 0.0039     | 145.14 <sup>a</sup>                |
| 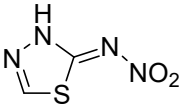 | -844.845816  | 0.0644   | 0.0080     | 294.61 <sup>a</sup>                |

|                                                                                   |             |        |        |                    |
|-----------------------------------------------------------------------------------|-------------|--------|--------|--------------------|
| 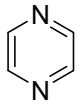 | -264.221963 | 0.0775 | 0.0051 | 196.1 <sup>a</sup> |
|-----------------------------------------------------------------------------------|-------------|--------|--------|--------------------|

<sup>a</sup>Calculated using G4 method.

**Table S9.** Calculated total energies ( $E_0$ ), zero-point energies (ZPE), and thermal corrections ( $H_T$ ) for target compounds at the M06-2X/def2-TZVPP level.

| Compd.                                                                              | $E_0$ (a.u.) | ZPE (au) | $H_T$ (au) | HOF <sub>gas</sub> /HOF <sub>anion</sub> (kJ/mol) | HOF <sub>Sub</sub> (kJ/mol) |
|-------------------------------------------------------------------------------------|--------------|----------|------------|---------------------------------------------------|-----------------------------|
| 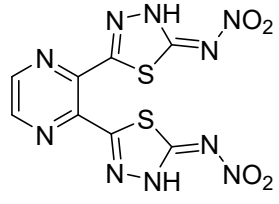   | -1951.588289 | 0.1661   | 0.0200     | 831.2                                             | 177.3                       |
|   | -1951.584511 | 0.1651   | 0.0207     | 740.0                                             | 170.1                       |
|  | -1950.495365 | 0.1377   | 0.0202     | 641.2                                             | -                           |
|  | -1542.623754 | 0.1591   | 0.0161     | 709.7                                             | 154.1                       |

**Table S10.** Calculated molecular surface properties of target compounds.

| Compd.                                                                              | Surface area (Å <sup>2</sup> ) | Volume (Å <sup>3</sup> ) | $\sigma_{tot}^2$ (kcal/mol) | $\nu$  |
|-------------------------------------------------------------------------------------|--------------------------------|--------------------------|-----------------------------|--------|
| 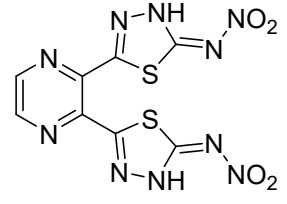 | 322.39                         | 341.28                   | 199.46                      | 0.2499 |

|  |        |       |        |        |
|--|--------|-------|--------|--------|
|  | 270.90 | 286.0 | 298.92 | 0.2495 |
|--|--------|-------|--------|--------|

**Table S11.** Energy content of salts 4-7.

| Compd.   | HOF <sub>c</sub> <sup>a</sup> | HOF <sub>a</sub> <sup>b</sup> | U <sub>Pot</sub> <sup>c</sup> | H <sub>L</sub> <sup>d</sup> | HOF <sub>salt</sub> <sup>e</sup> |
|----------|-------------------------------|-------------------------------|-------------------------------|-----------------------------|----------------------------------|
| <b>4</b> | 769.5                         | 641.2                         | 1145.70                       | 1158.09                     | 1022.11                          |
| <b>5</b> | 675.6                         | 641.2                         | 1137.94                       | 1150.33                     | 842.07                           |
| <b>6</b> | 1112.0                        | 641.2                         | 964.30                        | 976.69                      | 1888.51                          |
| <b>7</b> | 775.6                         | 641.2                         | 1043.63                       | 1056.02                     | 1136.38                          |

<sup>a</sup>Heat of formation of cation (kJ mol<sup>-1</sup>). HOF<sub>c</sub> data for cations is obtained from Ref. 5. <sup>b</sup>Heat of formation of anion (kJ mol<sup>-1</sup>). <sup>c</sup>Lattice potential energy (kJ mol<sup>-1</sup>). <sup>d</sup>Lattice energy (kJ mol<sup>-1</sup>). <sup>e</sup>Heat of formation of salt (kJ mol<sup>-1</sup>).

**Table S12.** Optimized coordinates of compound **2** at M06-2X/def2-TZVPP level of theory.

|    |              |              |              |
|----|--------------|--------------|--------------|
| 6  | 0.704182000  | 1.322440000  | 0.007883000  |
| 6  | -0.704130000 | 1.322517000  | -0.007805000 |
| 7  | 1.375944000  | 2.463968000  | 0.114172000  |
| 7  | -1.375773000 | 2.464109000  | -0.114126000 |
| 6  | 0.687835000  | 3.595799000  | 0.091325000  |
| 6  | -0.687544000 | 3.595870000  | -0.091303000 |
| 6  | 1.514668000  | 0.108138000  | -0.152675000 |
| 7  | 1.203827000  | -0.873849000 | -0.924432000 |
| 16 | 3.063536000  | -0.066508000 | 0.613679000  |
| 7  | 2.145097000  | -1.843741000 | -0.975631000 |
| 6  | 3.168538000  | -1.577351000 | -0.219246000 |
| 6  | -1.514728000 | 0.108286000  | 0.152768000  |
| 16 | -3.063281000 | -0.066589000 | -0.614155000 |
| 7  | -1.204138000 | -0.873519000 | 0.924855000  |

|   |              |              |              |
|---|--------------|--------------|--------------|
| 6 | -3.168683000 | -1.577120000 | 0.219292000  |
| 7 | -2.145471000 | -1.843356000 | 0.976035000  |
| 7 | 4.211579000  | -2.447431000 | -0.050292000 |
| 7 | -4.211748000 | -2.447171000 | 0.050311000  |
| 1 | 1.244088000  | 4.518454000  | 0.196859000  |
| 1 | -1.243699000 | 4.518582000  | -0.196853000 |
| 1 | 4.215680000  | -3.196115000 | -0.726334000 |
| 1 | 5.116177000  | -2.050278000 | 0.137458000  |
| 1 | -4.216106000 | -3.195628000 | 0.726603000  |
| 1 | -5.116261000 | -2.049995000 | -0.137807000 |

**Table S13.** Optimized coordinates of compound **3** at M06-2X/def2-TZVPP level of theory.

|    |              |              |              |
|----|--------------|--------------|--------------|
| 6  | 0.700227000  | 2.145018000  | 0.055494000  |
| 6  | -0.700132000 | 2.145198000  | -0.055237000 |
| 7  | 1.361074000  | 3.288968000  | 0.202481000  |
| 7  | -1.360697000 | 3.289286000  | -0.202353000 |
| 6  | 0.682268000  | 4.421847000  | 0.134777000  |
| 6  | -0.681607000 | 4.422005000  | -0.134739000 |
| 6  | 1.558116000  | 0.953006000  | -0.028292000 |
| 7  | 1.274389000  | -0.093703000 | -0.708701000 |
| 16 | 3.129322000  | 0.942131000  | 0.724797000  |
| 7  | 2.281208000  | -0.983077000 | -0.646204000 |
| 6  | 3.376086000  | -0.651932000 | 0.074120000  |
| 6  | -1.558246000 | 0.953345000  | 0.028619000  |
| 16 | -3.128692000 | 0.941844000  | -0.726011000 |
| 7  | -1.275188000 | -0.092793000 | 0.710176000  |
| 6  | -3.376081000 | -0.651706000 | -0.074324000 |
| 7  | -2.281929000 | -0.982243000 | 0.647377000  |
| 7  | 4.494958000  | -1.268184000 | 0.336824000  |
| 7  | -4.494644000 | -1.268217000 | -0.337743000 |
| 7  | 4.656336000  | -2.525033000 | -0.209824000 |
| 8  | 5.690440000  | -3.071769000 | 0.052127000  |

|   |              |              |              |
|---|--------------|--------------|--------------|
| 8 | 3.774031000  | -3.015929000 | -0.913492000 |
| 7 | -4.656494000 | -2.524692000 | 0.209620000  |
| 8 | -3.774918000 | -3.014989000 | 0.914619000  |
| 8 | -5.690383000 | -3.071597000 | -0.052826000 |
| 1 | 1.233285000  | 5.342338000  | 0.276114000  |
| 1 | -1.232391000 | 5.342622000  | -0.276167000 |
| 1 | 2.222564000  | -1.869198000 | -1.128374000 |
| 1 | -2.223782000 | -1.867954000 | 1.130361000  |

**Table S14.** Optimized coordinates of anionic component for salts **4-7** at M06-2X/def2-TZVPP level of theory.

|    |              |              |              |
|----|--------------|--------------|--------------|
| 6  | -0.696404000 | 2.019459000  | -0.151213000 |
| 6  | 0.696498000  | 2.019404000  | 0.151339000  |
| 7  | -1.308162000 | 3.169318000  | -0.424449000 |
| 7  | 1.308363000  | 3.169226000  | 0.424503000  |
| 6  | -0.641152000 | 4.303943000  | -0.255697000 |
| 6  | 0.641451000  | 4.303900000  | 0.255698000  |
| 6  | -1.566484000 | 0.842826000  | -0.099037000 |
| 7  | -1.400488000 | -0.139467000 | 0.727875000  |
| 16 | -3.056558000 | 0.760180000  | -0.969360000 |
| 7  | -2.408286000 | -1.035386000 | 0.743486000  |
| 6  | -3.375687000 | -0.735125000 | -0.102666000 |
| 6  | 1.566462000  | 0.842693000  | 0.099249000  |
| 16 | 3.056585000  | 0.760010000  | 0.969486000  |
| 7  | 1.400319000  | -0.139729000 | -0.727502000 |
| 6  | 3.375424000  | -0.735502000 | 0.103128000  |
| 7  | 2.407961000  | -1.035750000 | -0.742954000 |
| 7  | -4.522844000 | -1.340101000 | -0.476476000 |
| 7  | 4.522132000  | -1.341155000 | 0.477198000  |
| 7  | 5.003271000  | -2.328868000 | -0.286468000 |
| 8  | 4.539320000  | -2.600395000 | -1.388808000 |
| 8  | 5.979202000  | -2.929217000 | 0.177006000  |

|   |              |              |              |
|---|--------------|--------------|--------------|
| 7 | -5.003257000 | -2.329078000 | 0.286013000  |
| 8 | -5.980485000 | -2.927756000 | -0.176941000 |
| 8 | -4.537354000 | -2.603379000 | 1.386824000  |
| 1 | -1.155822000 | 5.225177000  | -0.504525000 |
| 1 | 1.156203000  | 5.225101000  | 0.504478000  |

## References:

- (1) Ghosh, P., Mandal, A. *Green Chemistry Letters and Reviews*, **2011**, *5*, 127–134.
- (2) Gaussian 09, Revision E.01, M. J.Frisch, G. W. Trucks, H. B. Schlegel, G. E. Scuseria, M A. Robb, J. R. Cheeseman, G. Scalmani, V. Barone, B. Mennucci, G. A. Petersson, H. Nakatsuji, M Caricato, X. Li, H. P. Hratchian, A. F. Izmaylov, J. Bloino, G. Zheng, J. L. Sonnenberg, M. Hada, M. Ehara, K. Toyota, R. Fukuda, J. Hasegawa, M. Ishida, T. Nakajima, Y. Honda, O. Kitao, H. Nakai, T. Vreven, Jr. J. A. Montgomery, J. E. Peralta, F. Ogliaro, M. Bearpark, J. J. Heyd, E. Brothers, K. N. Kudin, V. N. Staroverov, R. Kobayashi, J. Normand, K. Raghavachari, A. Rendell, J. C. Burant, S. S. Iyengar, J. Tomasi, M. Cossi, N. Rega, J. M. Millam, M. Klene, J. E. Knox, J. B. Cross, V. Bakken, C. Adamo, J. Jaramillo, R. Gomperts, R. E. Stratmann, O. Yazyev, A. J. Austin, R. Cammi, C. Pomelli, J. W. Ochterski, R. L. Martin, K. Morokuma, V. G. Zakrzewski, G. A. Voth, P. Salvador, J. J. Dannenberg, S. Dapprich, A. D. Daniels, O. Farkas, J. B. Foresman, J. V. Ortiz, J. Cioslowski, D. J. Fox, *Gaussian*, Inc., Wallingford CT, **2013**.
- (3) Byrd, E. F. C; Rice, B. M.; *J. Phys. Chem. A* **2006**, *110*, 1005-1013.
- (4) Lu, T.; Chen, F.; *J. Comput. Chem.* **2012**, *33*, 580.
- (5) Jenkins, H. D. B.; Tudela, D.; Glasser, L. *Inorg. Chem.* **2002**, *41*, 2364-2367.
